1 **C-Jun N-terminal Kinase Promotes Stress Granule Assembly and Neurodegeneration in**  
2 **C9orf72-mediated ALS and FTD**

3 Sahana TG<sup>1</sup>, Katherine Johnson Chase<sup>1</sup>, Feilin Liu<sup>1</sup>, Thomas E. Lloyd<sup>2</sup>, Wilfried Rossoll<sup>1,3</sup>, and  
4 Ke Zhang<sup>1,3</sup>

5 <sup>1</sup> **Department of Neuroscience, Mayo Clinic, Jacksonville, FL 32224, USA**

6 <sup>2</sup> **Department of Neurology, Johns Hopkins School of Medicine, MD 21205, USA**

7 <sup>3</sup> **Neuroscience Graduate Program, Mayo Clinic Graduate School of Biomedical Sciences,**  
8 **Jacksonville, FL 32224, USA**

9 Send correspondence to:

10 Ke Zhang, Department of Neuroscience, Mayo Clinic, 4500 San Pablo Rd S, Jacksonville, FL  
11 32224, USA. Email: [zhang.ke@mayo.edu](mailto:zhang.ke@mayo.edu)

12

## 13 **Abstract**

14 Stress granules (SGs), RNA/protein condensates assembled in cells under stress, are believed to  
15 play a critical role in the pathogenesis of amyotrophic lateral sclerosis (ALS) and frontotemporal  
16 dementia (FTD). However, how SG assembly is regulated and related to pathomechanism is  
17 incompletely understood. Here, we show that ER stress activates JNK via IRE1 in fly and cellular  
18 models of C9orf72-mediated ALS/FTD (c9ALS/FTD), the most common genetic form of  
19 ALS/FTD. Furthermore, activated JNK promotes SG assembly induced by poly(GR) and  
20 poly(PR), two toxic proteins implicated in c9ALS/FTD, by promoting the transcription of G3BP1,  
21 a key SG protein. Consistent with these findings, JNK or IRE1 inhibition reduced SG formation,  
22 G3BP1 mRNA and protein levels, and neurotoxicity in cells overexpressing poly(GR) and  
23 poly(PR) or neurons derived from c9ALS/FTD patient induced pluripotent stem cells (iPSCs). Our  
24 findings connect ER stress, JNK, and SG assembly in a unified pathway contributing to  
25 c9ALS/FTD neurodegeneration.

## 26 **Introduction**

27 A GGGGCC (G<sub>4</sub>C<sub>2</sub>) hexanucleotide repeat expansion in chromosome 9, open reading frame 72  
28 (*C9ORF72*) is the most common genetic cause of amyotrophic lateral sclerosis (ALS) and  
29 frontotemporal dementia (FTD) (DeJesus-Hernandez et al., 2011; Renton et al., 2011). This repeat  
30 expansion can cause cytotoxicity via multiple mechanisms, one of which suggests that it undergoes  
31 repeat-associated, non-ATG translation to produce five different species of dipeptide repeat  
32 proteins (DPRs), namely poly(glycine-arginine, GR), poly(glycine-alanine, GA), poly(glycine-  
33 proline, GP), poly(proline-alanine, PA), and poly(proline-arginine, PR)(Ash et al., 2013; Donnelly  
34 et al., 2013; Gendron et al., 2013; Ling, Polymenidou, & Cleveland, 2013; Mori, Arzberger, et al.,

35 2013; Mori, Weng, et al., 2013; Zu et al., 2013). Among these DPRs, the arginine-rich DPRs (R-  
36 DPRs) i.e., poly(GR), and poly(PR), are especially toxic (Kwon et al., 2014; K. H. Lee et al., 2016;  
37 Lin et al., 2016; Mizielinska et al., 2014; Sakae et al., 2018; K. Zhang et al., 2018; Y. J. Zhang et  
38 al., 2018; Zhang et al., 2019).

39 Stress granules (SGs) are cytoplasmic RNA/protein condensates assembled in cells under  
40 stress (Protter & Parker, 2016). Upon stress, polysomes disassemble, and mRNAs are embedded  
41 by a variety of RNA-binding proteins, whose condensation mediates SG assembly (Guillen-Boixet  
42 et al., 2020; Sanders et al., 2020; P. Yang et al., 2020). Under normal conditions, SGs are dynamic  
43 and disassemble when stress is removed (Lin, Protter, Rosen, & Parker, 2015; Protter & Parker,  
44 2016). However, aberrant SG formation can trigger aggregation of SG proteins, such as TDP-43  
45 and FUS (A.N. Coyne et al., 2015; Daigle et al., 2013). Since the aggregation of these proteins is  
46 a pathological hallmark of ALS and FTD, including c9ALS/FTD, SGs are believed to play a  
47 critical role in ALS/FTD pathogenesis (Anderson & Kedersha, 2008; Kedersha, Tisdale, Hickman,  
48 & Anderson, 2008; Li, King, Shorter, & Gitler, 2013). Consistent with this notion, R-DPRs interact  
49 with many SG proteins, and their overexpression causes the formation of aberrant, poorly dynamic  
50 SGs in cells without additional stress (Boeynaems et al., 2017; K. H. Lee et al., 2016; K. Zhang et  
51 al., 2018). In addition, chemically synthesized R-DPRs can undergo liquid-liquid phase separation  
52 (LLPS), recruit SG proteins, and cause SG protein precipitation in cellular lysates (Boeynaems et  
53 al., 2017). Also, poly(GR) can localize to SGs, promote the aggregation of recombinant TDP-43  
54 *in vitro*, and co-aggregate with TDP-43 and the SG protein eIF3 $\eta$  in c9ALS/FTD patient  
55 postmortem tissue (Cook et al., 2020). In agreement with these data, we previously found that  
56 inhibiting SG assembly by genetic or pharmacological approaches suppresses R-DPR-induced  
57 cytotoxicity or neurodegeneration in cellular or animal models (K. Zhang et al., 2018). Together,

58 these findings suggest that R-DPRs cause neurodegeneration by promoting aberrant SG formation.  
59 However, how this process is regulated is unclear.

60 In a *Drosophila* RNAi screen, we previously identified that loss of *bsk*, the fly homolog of c-  
61 Jun N-terminal kinase (JNK), suppresses neurodegeneration in a fly model of c9ALS/FTD (K.  
62 Zhang et al., 2015). Here, we show that JNK is activated in fly and cellular models of c9ALS/FTD  
63 via ER stress response protein IRE1 and activated JNK promotes R-DPR-induced SG formation  
64 by promoting the transcription of G3BP1, a key protein involved in SG assembly (Deniz, 2020;  
65 Guillen-Boixet et al., 2020; P. Yang et al., 2020). Inhibiting ER stress responses or JNK activity  
66 suppresses R-DPR-induced SG formation, G3BP1 mRNA and protein levels, and cytotoxicity in  
67 cells expressing R-DPRs or c9ALS/FTD patient iPSC-derived neurons (iPSNs). Our findings  
68 identified a molecular mechanism by which the ER stress/IRE1/JNK axis promotes long-term-  
69 stress-induced SG formation and suggested a unified, druggable pathway contributing to  
70 c9ALS/FTD pathogenesis.

## 71 **Results**

### 72 **Loss of *bsk*/JNK suppresses neurodegeneration caused by G<sub>4</sub>C<sub>2</sub> repeats in *Drosophila***

73 Expression of 30 G<sub>4</sub>C<sub>2</sub> repeats [(G<sub>4</sub>C<sub>2</sub>)<sub>30</sub>] in fly eyes using GMR-GAL4 causes neurodegeneration,  
74 as indicated by defects in the external eye morphology that worsen with age (Xu et al., 2013; K.  
75 Zhang et al., 2015). Using this fly model, our previously published RNAi screen identified *bsk*  
76 RNAi to potently suppress (G<sub>4</sub>C<sub>2</sub>)<sub>30</sub>-mediated eye degeneration (K. Zhang et al., 2015), which we  
77 verified (**Fig. 1a**). Furthermore, we show that (G<sub>4</sub>C<sub>2</sub>)<sub>30</sub> expression in motor neurons using vGlut-  
78 GAL4 causes paralysis in pharate flies, as indicated by their inability to eclose (Cunningham et  
79 al., 2020). Here, we show that *bsk* RNAi suppresses this phenotype (**Fig. 1b**). Thus, loss of *bsk*  
80 suppresses (G<sub>4</sub>C<sub>2</sub>)<sub>30</sub>-mediated toxicity in fly eyes and motor neurons.

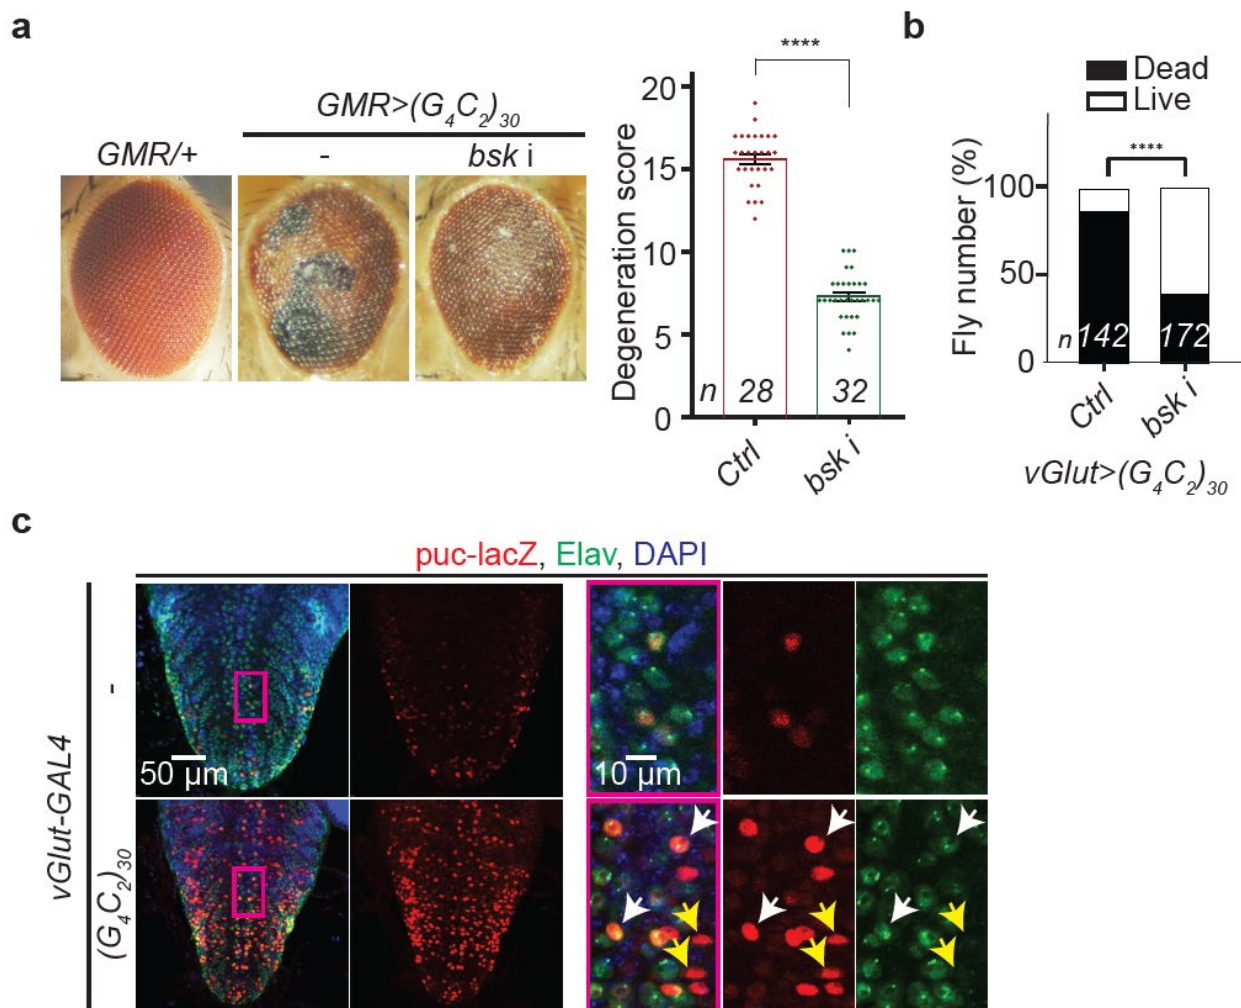

81  
82 **Figure 1: JNK/bsk is activated in a fly model of c9ALS/FTD.** (a) Fly eyes expressing (G<sub>4</sub>C<sub>2</sub>)<sub>30</sub>  
83 using GMR-GAL4, without or with *bsk* RNAi (*bsk i*). Scored using a previously published method  
84 (G.P. Ritson et al., 2010). Mean  $\pm$  s.e.m. Student's t-test; \*\*\*\*:  $p < 0.0001$  (b) Percent of eclosed  
85 adult flies expressing (G<sub>4</sub>C<sub>2</sub>)<sub>30</sub> in motor neurons using vGlut-GAL4, without (control, Ctrl) or with  
86 *bsk i*.  $\chi^2$ -test; \*\*\*\*:  $p < 0.0001$  (c) Fly ventral nerve cord motor neurons expressing *puc-lacZ*  
87 without or with co-expressing (G<sub>4</sub>C<sub>2</sub>)<sub>30</sub>, stained with lacZ (red), Elav (a neuronal marker, green),  
88 and DAPI (blue).

89        Next, we tested whether Bsk is hyperactive in neurons expressing G<sub>4</sub>C<sub>2</sub> repeats. Bsk/JNK  
90 belongs to the mitogen-activated protein kinase (MAPK) family, which is activated by JNK  
91 kinases (Kim & Choi, 2010; Sahana & Zhang, 2021). Upon activation, Bsk/JNK activates the  
92 transcription of downstream genes, including its inhibitor, JNK phosphatase (fly homolog:  
93 *puckered*, or *puc*). Thus, the level of Puc/JNK phosphate can be used to indicate Bsk/JNK activity.  
94 Indeed, a LacZ reporter under the control of the *puc* promoter (*puc-LacZ*) is widely used as a

95 reporter of Bsk/JNK activity in flies (Martin-Blanco et al., 1998; Ring & Arias, 1993). Using this  
96 reporter, we show that the LacZ level is strongly upregulated in motor neurons expressing  
97 (G<sub>4</sub>C<sub>2</sub>)<sub>30</sub>, compared to the control (**Fig. 1c**), suggesting that expression of G<sub>4</sub>C<sub>2</sub> repeats causes JNK  
98 activation.

### 99 **Expression of G<sub>4</sub>C<sub>2</sub> repeats causes ER stress in *Drosophila***

100 Previous studies showed that JNK can be activated by ER stress. Upon ER stress, inositol requiring  
101 enzyme 1 (IRE1), a protein with both kinase and endonuclease activities, is activated, which  
102 recruits the tumor necrosis factor receptor-associated factor 2 (TRAF2). The IRE1/TRAF2  
103 complex phosphorylates and activates apoptosis signal-regulating kinase (ASK-1), a MAP kinase  
104 kinase kinase (MAP3K), which activates its downstream target JNK (Urano et al., 2000).  
105 Furthermore, previous studies have implicated ER stress in c9ALS/FTD iPSNs (Dafinca et al.,  
106 2016; Haeusler et al., 2014). Here, we show that RNAi against IRE1, TRAF2, or ASK-1 suppresses  
107 eye degeneration in flies expressing (G<sub>4</sub>C<sub>2</sub>)<sub>30</sub>, suggesting that these proteins contribute to G<sub>4</sub>C<sub>2</sub>-  
108 repeat-mediated neurotoxicity (**Fig. 2a**).

109

110

**a**

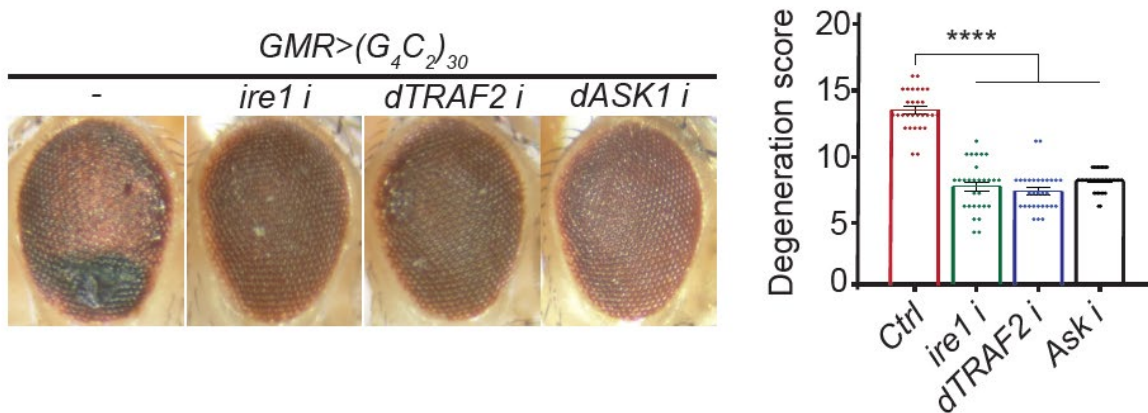

**b**

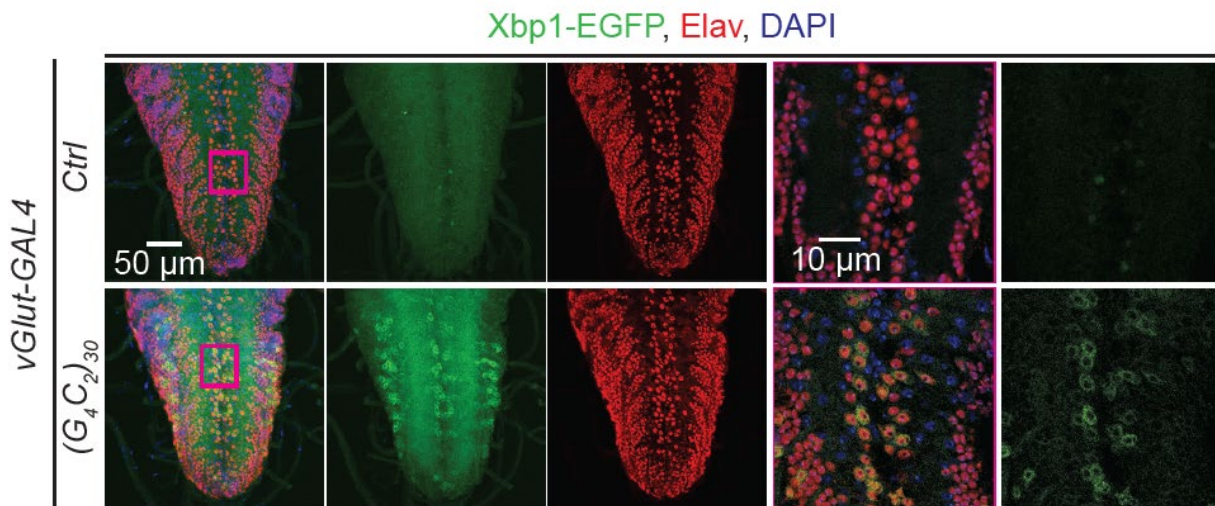

111 **Figure 2: ER stress contributes to neurodegeneration in a fly model of c9ALS/FTD.** (a) Fly  
112 eyes expressing  $(G_4C_2)_{30}$  without or with RNAi against *ire1*, *dASK1* and *dTRAF2*. Mean  $\pm$  s.e.m.  
113 One-way ANOVA; \*\*\*\*:  $p < 0.0001$ . (b) Fly VNC motor neurons expressing Xbp1-GFP without  
114 or with  $(G_4C_2)_{30}$ , stained with Elav (a neuronal marker, red) and DAPI (blue).  
115

116 Next, we investigated the IRE1 activity in fly neurons. Upon IRE1 activation, its endonuclease  
117 activity causes the alternative splicing of X-box-binding protein 1 (XBP1) mRNA. In fly studies,  
118 a widely used IRE1 reporter is an XBP1-GFP system, in which GFP is expressed only when XBP1  
119 is alternatively spliced due to IRE1 activation (Sone, Zeng, Larese, & Ryoo, 2013). Using this  
120 system, we show that GFP is strongly upregulated in motor neurons expressing  $(G_4C_2)_{30}$ , compared  
121 to the control (**Fig. 2b**), suggesting that expression of  $G_4C_2$  repeats causes IRE1 activation.

122 Together, our data suggest that G<sub>4</sub>C<sub>2</sub> repeats cause ER stress, further leading to toxicity in  
123 *Drosophila*.

#### 124 **R-DPRs cause JNK activation and ER stress in U-2 OS cells**

125 Among five DPR species, the R-DPRs, i.e., poly(GR) and poly(PR), are highly toxic and cause  
126 eye degeneration and cytotoxicity in *Drosophila* and cultured cells (Mizielinska et al., 2014). Thus,  
127 we investigated their roles in JNK activation and ER stress. First, we show that *bsk* RNAi  
128 suppresses eye degeneration caused by 36 repeats of poly(GR) or poly(PR) (**Supplementary Fig.**  
129 **1**), suggesting that JNK contributes to poly(GR) and poly(PR)-mediated toxicity. Next, we  
130 switched to U-2 osteosarcoma (OS) cells, which are widely used to study cellular stress responses  
131 and R-DPR toxicity for their human relevance and ease to dissect cellular mechanisms  
132 (Boeynaems et al., 2017; Kwon et al., 2014; Ohn, Kedersha, Hickman, Tisdale, & Anderson, 2008;  
133 P. Yang et al., 2020).

134 Using an MTT cell survival assay, we show that transiently expressing mCherry-tagged, 100  
135 repeats of poly(GR) or poly(PR) [(GR)<sub>100</sub>- or (PR)<sub>100</sub>-mCherry] for 48 hours impairs U-2 OS cell  
136 survival, compared to the mCherry control, which is partially suppressed by a 24-hour co-treatment  
137 of a pan-JNK inhibitor, SP600125 (**Fig. 3a**). These data suggest that inhibiting JNK activity  
138 suppresses R-DPR-mediated cytotoxicity, consistent with our fly data (**Supplementary Fig. 1**).  
139 Furthermore, both our immunofluorescent staining and Western blots show that (GR)<sub>100</sub>- and  
140 (PR)<sub>100</sub>-mCherry increase the levels of phosphorylated JNK (pJNK), the activated JNK form,  
141 compared to the mCherry control (**Fig. 3b and c**), suggesting that R-DPRs activate JNK in U-2  
142 OS cells.



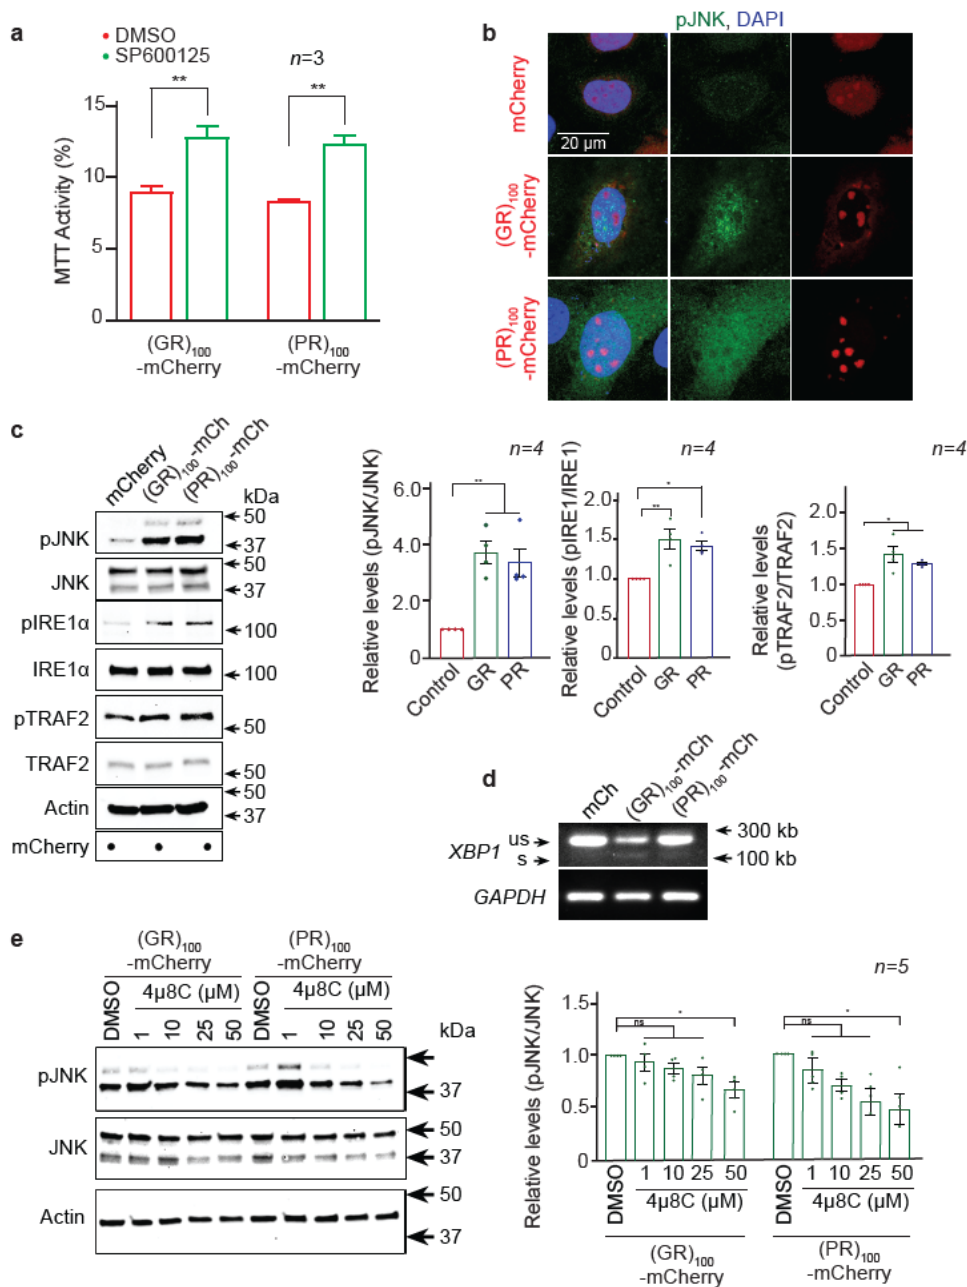

143

144 **Figure 3: ER stress and JNK is activated in U-2 OS cells expressing R-DPRs.** (a) MTT assays  
 145 of U-2 OS cells expressing (GR/PR)<sub>100</sub>-mCherry, treated with DMSO or 50 μM of SP600125 for  
 146 24 h. MTT activity of U-2 OS cells expressing mCherry is taken as 100%. Mean ± s.e.m. Student's  
 147 t-tests; \*\*,  $p < 0.01$ . (b) U-2 OS cells expressing mCherry or (GR/PR)<sub>100</sub>-mCherry (red) stained  
 148 with pJNK (green) and DAPI (blue). (c) Western or dot (for mCherry only) blots for lysates from  
 149 U-2 OS cell expressing mCherry or (GR/PR)<sub>100</sub>-mCherry. Mean ± s.e.m. One-way ANOVA; \*\*,  
 150  $p < 0.01$ ; \*,  $p < 0.05$ . (d) DNA gels showing spliced variants of XBP1 (us: unspliced and s: spliced)  
 151 from cDNA of U-2 OS cell expressing mCherry or (GR/PR)<sub>100</sub>-mCherry. (e) Western blots for  
 152 lysates from U-2 OS cell expressing mCherry or (GR/PR)<sub>100</sub>-mCherry co-treated with DMSO or  
 153 4μ8C for 6 h. Mean ± s.e.m. One-way ANOVA; \*,  $p < 0.05$ , ns, not significant.

154 Next, we investigated whether (GR)<sub>100</sub>- or (PR)<sub>100</sub>-mCherry induces ER stress. As shown in  
155 **Fig. 3c and d**, transient expression of (GR)<sub>100</sub>- or (PR)<sub>100</sub>-mCherry causes upregulation of  
156 phosphorylated IRE1 (pIRE1) and TRAF2 (pTRAF2), i.e., activated forms of IRE1 and TRAF2,  
157 as well as alternative splicing of XBP1 mRNA in U-2 OS cells, compared to the mCherry control,  
158 suggesting that R-DPRs activates IRE1 in these cells. Of note, 4 $\mu$ 8C, an inhibitor of both IRE1  
159 kinase and endonuclease activities (Cross et al., 2012), dose-dependently suppresses pJNK levels  
160 in U-2 OS cells expressing (GR)<sub>100</sub>- or (PR)<sub>100</sub>-mCherry (**Fig. 3e**), suggesting that R-DPRs activate  
161 JNK via IRE1.

#### 162 **Inhibiting JNK or IRE1 activity suppresses R-DPR-induced SG formation in U-2 OS cells**

163 SGs play a critical role in R-DPR-mediated cytotoxicity. Indeed, R-DPRs can induce poorly  
164 dynamic SGs in cultured cells without additional stress (Boeynaems et al., 2017; K. H. Lee et al.,  
165 2016). When expressed in U-2 OS cells for 48 hours, (GR)<sub>100</sub>- or (PR)<sub>100</sub>-mCherry respectively  
166 causes ~70% or ~30% cells to exhibit SGs, as indicated by immunofluorescent staining of G3BP1  
167 and TIA1, two SG markers (**Fig. 4 and Supplementary Fig. 2**). Furthermore, treating the cells  
168 with 50  $\mu$ M of SP600125 for 24 hours or 4 $\mu$ 8C for six hours significantly decreases the percent of  
169 cells exhibiting SGs, but not R-DPR protein levels (**Fig. 4 and Supplementary Fig. 2**), suggesting  
170 that IRE1/JNK promotes R-DPR-induced SG assembly.

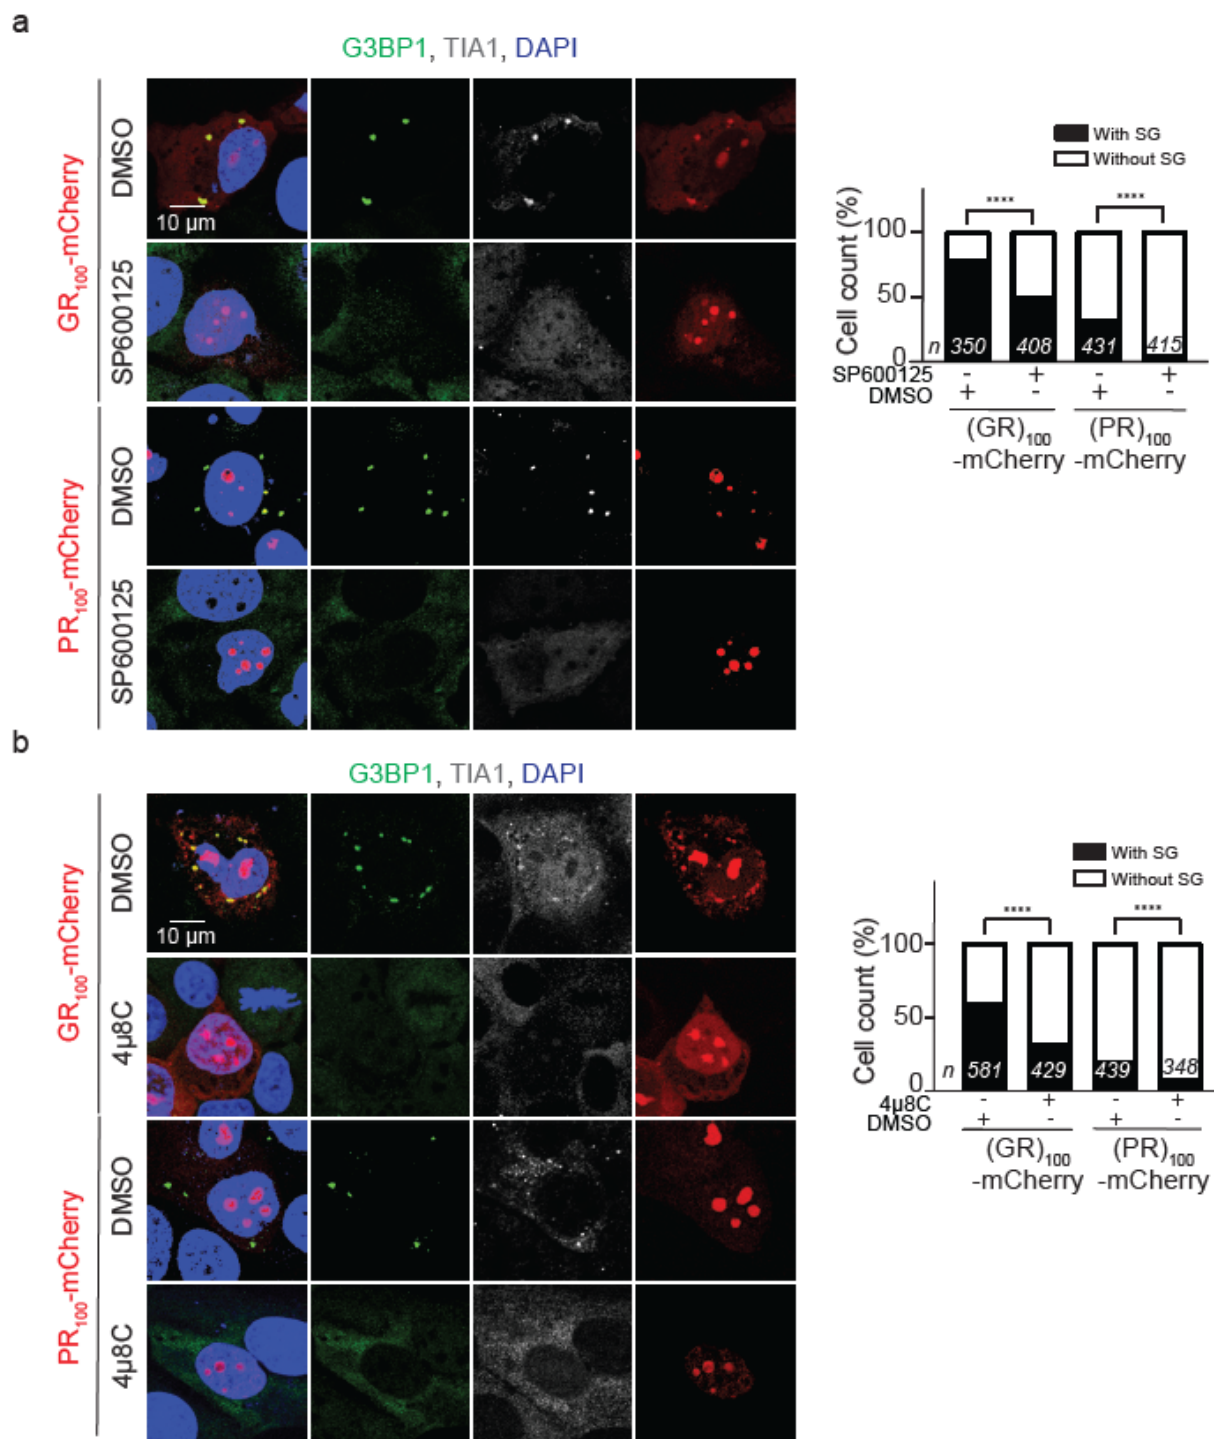

171  
 172 **Figure 4: ER stress and JNK promote R-DPR-induced SG assembly in U-2 OS**  
 173 cells expressing (GR/ PR)<sub>100</sub>-mCherry (red) treated with DMSO, 50 μM SP600125, or 50 μM  
 174 4μ8C and stained with G3BP1 (green), TIA1 (white), and DAPI (blue). Quantification showing  
 175 percent of cells with or without SGs.  $\chi^2$ -test; \*\*\*\*:  $p < 0.0001$ .

176 G3BP1 plays a critical role in SG assembly, as its knockdown strongly reduces SG formation  
177 caused by a variety of stressors, whereas its overexpression induces SG formation without  
178 additional stress (Kedersha et al., 2016). In addition, we and others found that double-knockout of  
179 G3BP1 and its homolog, G3BP2, completely abolishes R-DPR-induced SGs (Boeynaems et al.,  
180 2017; K. Zhang et al., 2018). Here, we show that a 24- or six-hour treatment of SP600125 or 4 $\mu$ 8C,  
181 respectively, strongly decreases G3BP1 levels in cells expressing (GR)<sub>100</sub>- or (PR)<sub>100</sub>-mCherry  
182 (**Fig. 5a and b**), suggesting that JNK inhibition downregulates G3BP1. In addition, we found that  
183 these inhibitors decrease G3BP2, but not TIA1, levels (**Fig. 5a**), suggesting that JNK regulates  
184 some SG proteins.

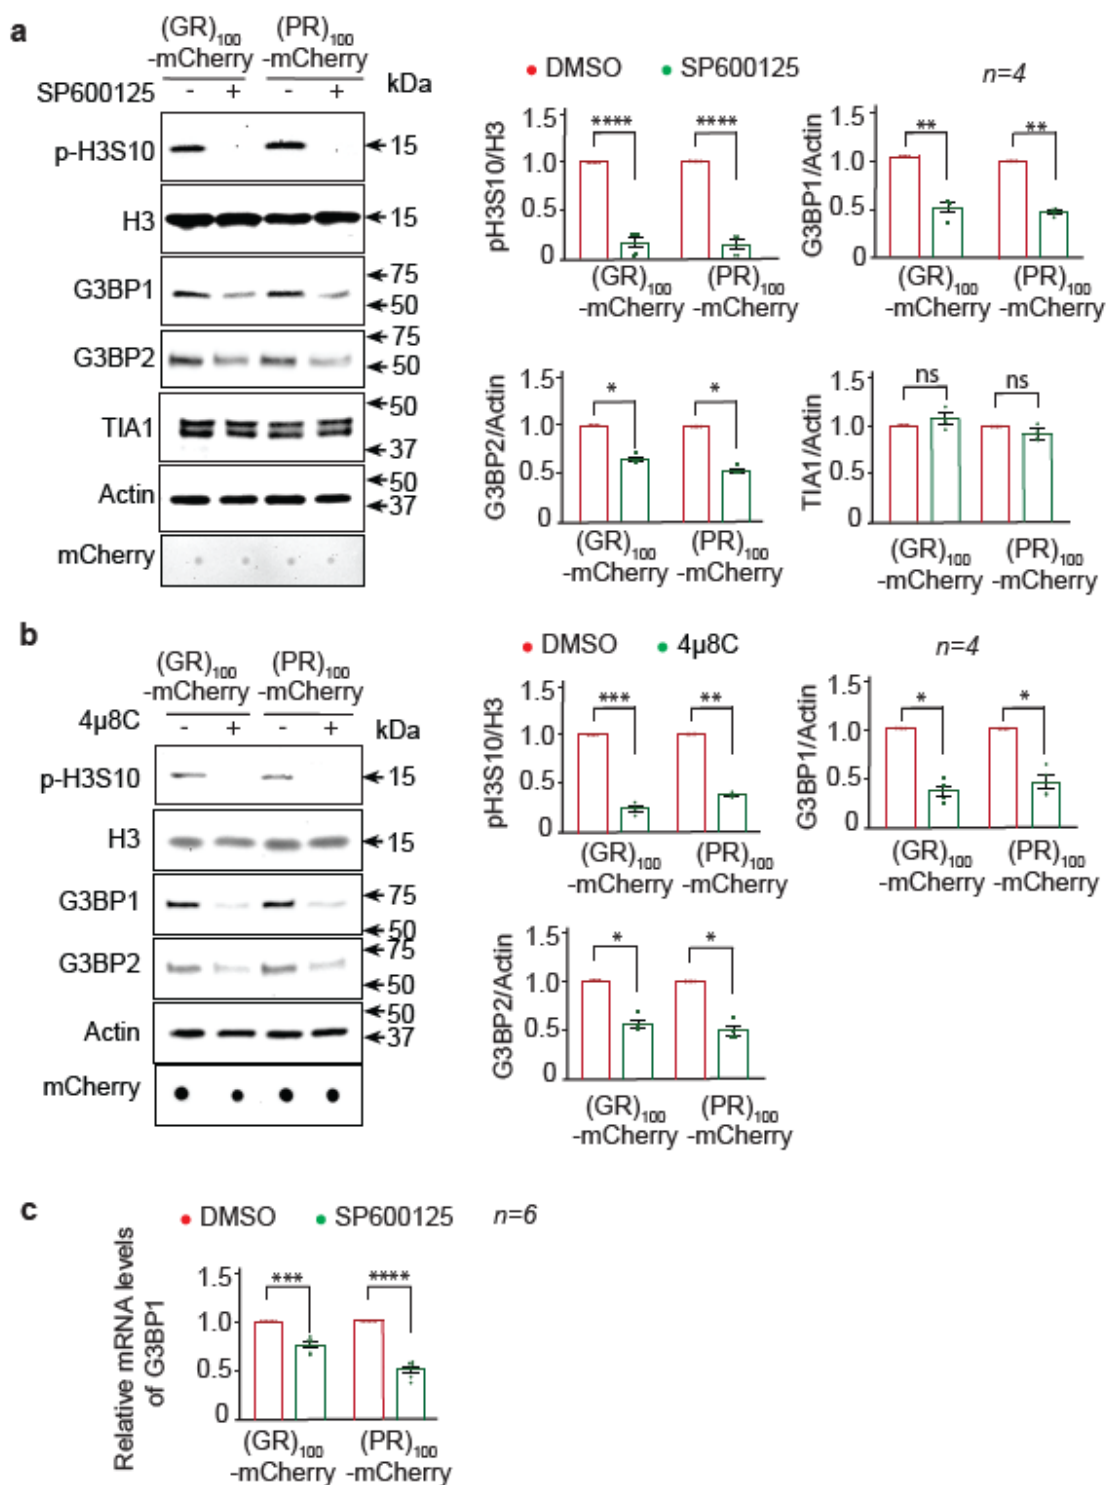

185

186 **Figure 5: JNK promotes G3BP1 expression and H3S10 phosphorylation in U-2 OS cell**  
 187 **expressing R-DPRs.** Western or dot (for mCherry only) blots of lysates from U-2 OS cells  
 188 expressing (GR/PR)<sub>100</sub>-mCherry, treated with DMSO or (a) 50 μM SP600125 and (b) 50 μM

189 4 $\mu$ 8C. (c) Relative levels of G3BP1 mRNA as compared to GAPDH from U-2 OS cells expressing  
190 (GR/PR)<sub>100</sub>-mCherry, treated with DMSO or 50  $\mu$ M SP600125. Mean  $\pm$  s.e.m. Student's t-tests;  
191 \*\*\*\*,  $p < 0.0001$ ; \*\*\*,  $p < 0.001$ ; \*\*,  $p < 0.01$ ; \*,  $p < 0.05$ ; ns, not significant.

192 A U-2 OS cell line stably expressing GFP-tagged G3BP1 (G3BP1-GFP) under the control of  
193 a lentiviral promoter is widely used to study SG biology (Figley, Bieri, Kolaitis, Taylor, & Gitler,  
194 2014). We found that SP600125 suppresses the level of endogenous G3BP1, but not G3BP1-GFP,  
195 in these cells when transfected with (GR)<sub>100</sub>- or (PR)<sub>100</sub>-mCherry (**Supplementary Fig. 3**),  
196 possibly because the regulation of JNK on G3BP1 relies on the genomic promoter of *G3BP1*. If  
197 this is the case, JNK inhibition likely suppresses *G3BP1* transcription. Indeed, as shown in **Fig.**  
198 **5c**, SP600125 significantly decreases *G3BP1* mRNA levels in U-2 OS cells expressing (GR)<sub>100</sub>-  
199 or (PR)<sub>100</sub>-mCherry, suggesting that JNK regulates G3BP1 at the transcriptional level in these  
200 cells.

201 Widely used in SG studies, sodium arsenite induces ER stress and SG assembly within an hour  
202 (Anderson & Kedersha, 2008; Cheng et al., 2018; Wheeler, Matheny, Jain, Abrisch, & Parker,  
203 2016; P. Yang et al., 2020). To test whether JNK also plays a role in arsenite-induced SG  
204 formation, we co-treated U-2 OS cells with 0.5 mM sodium arsenite and 50  $\mu$ M of SP600125 for  
205 an hour. As shown in **Supplementary Fig. 4**, SP600125 suppresses the pJNK level, but not the  
206 percentage of SG-positive cells, suggesting that JNK does not contribute to SG assembly caused  
207 by one-hour arsenite stress. Consistent with these data, cellular G3BP1 levels are unaltered in these  
208 cells, suggesting that one-hour JNK inhibition is insufficient to affect G3BP1 protein levels or SG  
209 assembly.

210 A prior study showed that in mouse differentiating neurons, activated JNKs in the nucleus are  
211 enriched in the promoter regions of certain genes, including G3BP1, where they phosphorylate  
212 certain chromatin components i.e., histone 3 protein at Serine10 position (H3S10) (Tiwari et al.,

213 2011). As H3S10 phosphorylation (pH3S10) causes the chromatin to adopt an “open” chromatin  
214 structure, which activates transcription (Allis & Jenuwein, 2016; Rossetto, Avvakumov, & Cote,  
215 2012; Stricker, Kofler, & Beck, 2017), one possible mechanism by which JNK regulates *G3BP1*  
216 transcription is via pH3S10. Consistent with this notion, a 24- or six-hour treatment of SP600125  
217 or 4 $\mu$ 8C, respectively, strongly suppresses pH3S10 levels in U-2 OS cells expressing (GR)<sub>100</sub>- or  
218 (PR)<sub>100</sub>-mCherry (**Fig. 5a and b**).

### 219 **Inhibiting IRE1/JNK activity suppresses neurotoxicity in c9ALS/FTD patient-derived iPSNs**

220 To validate our findings in a patient-relevant model, we used iPSC-derived neurons (iPSNs)  
221 derived from c9ALS/FTD patients. While these iPSNs rarely exhibit SGs under non-stressed  
222 conditions, we previously showed that they are constitutively under a low level of stress, as  
223 indicated by a mild increase in the phospho-eIF2 $\alpha$ . In addition, SG inhibitors GSK2606414 and  
224 ISRIB, which suppress R-DPR-induced SG formation, suppress subcellular defects in these iPSNs,  
225 suggesting that SG assembly contributes to the iPSN toxicity (K. Zhang et al., 2018).

226 Compared to control iPSNs, c9ALS/FTD iPSNs do not exhibit a strong phenotype or reduced  
227 survival under non-stressed conditions but are more sensitive to a variety of stressors, including  
228 the ER stressor tunicamycin (Donnelly et al., 2013; Haeusler et al., 2014; Shi et al., 2018). We  
229 show that a 24-hour treatment of five  $\mu$ M tunicamycin (TM) causes cell death, as indicated by  
230 propidium iodide (PI) staining, in four different c9ALS/FTD iPSN lines, which is suppressed by  
231 co-treatments of either SP600125 or 4 $\mu$ 8C (**Fig. 6a and Supplementary Fig. 5**). Consistent with  
232 these data, we show that the G3BP1 level in the c9ALS/FTD iPSNs increases upon tunicamycin  
233 treatment, which is suppressed by SP600125 and 4 $\mu$ 8C (**Fig. 6b**). Together, these data suggest that  
234 inhibiting IRE1/JNK activity suppresses neurotoxicity and the G3BP1 level in c9ALS/FTD iPSNs.

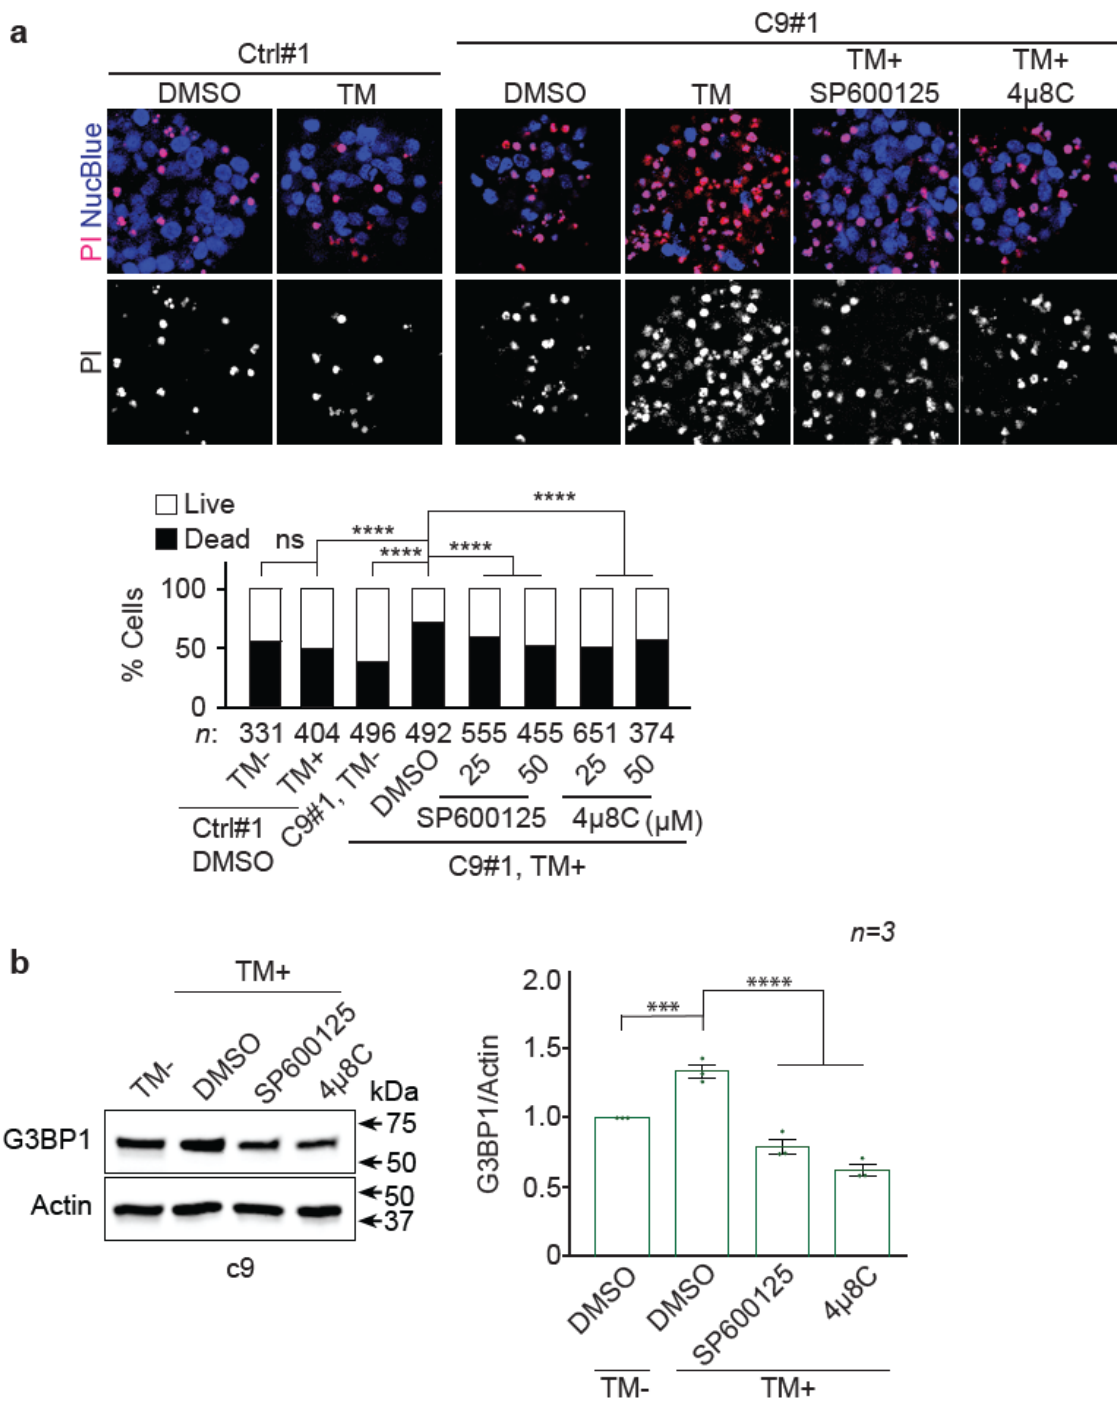

235  
 236 **Figure 6: Inhibition of JNK or ER stress suppresses toxicity in c9ALS/FTD iPSNs.** (a)  
 237 Control (Ctrl) or c9ALS/FTD (c9) Line #1 iPSNs treated with 5 μM tunicamycin (TM) together  
 238 with DMSO, SP600125, or 4μ8C and stained with propidine iodide (PI, dead cells) and NucBlue  
 239 (all cells). Quantification shows the percent of live and dead cells.  $\chi^2$ -test. Mean  $\pm$  s.e.m. One-  
 240 way ANOVA with Dunnett's test; \*\*\*\*:  $p < 0.0001$ . (b) Western blot of c9 lysates treated with 5  
 241 μM tunicamycin (TM) together with DMSO, JNK inhibitor SP600125, or IRE1 inhibitor 4μ8C.  
 242 Mean  $\pm$  s.e.m. Student's t-tests; \*\*\*\*,  $p < 0.0001$ ; \*\*\*,  $p < 0.001$ .



## 243 Loss of G3BP/Rin suppresses neurodegeneration in c9ALS/FTD fly models

244 Previously, we showed that G3BP1/2 double KO abolishes R-DPR-induced cellular defects in U-  
245 2 OS cells and SG inhibitors GSK2606414 and ISRIB suppress  $(G_4C_2)_{30}$ -mediated eye  
246 degeneration in flies (K. Zhang et al., 2018), suggesting that inhibiting SG formation suppresses  
247 c9ALS/FTD-related cytotoxicity or neurodegeneration. Given the importance of G3BP1 and 2 in  
248 SG assembly, we postulate that loss of G3BP also suppresses neurodegeneration. In flies, *rin* is  
249 the only homolog of mammalian *G3BP1* and 2. Here, we show that a loss of function *rin* mutation  
250 heterozygously suppresses eye degeneration caused by  $(G_4C_2)_{30}$ ,  $(GR)_{36}$ , or  $(PR)_{36}$  (Fig. 7),  
251 suggesting that loss of G3BP/Rin suppresses neurodegeneration in fly models of c9ALS/FTD.

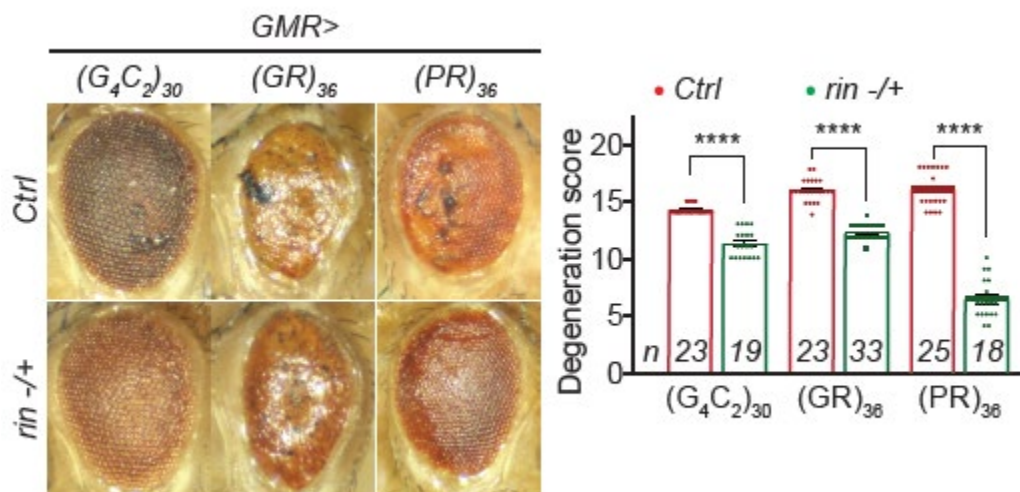

252 **Figure 7: Loss of G3BP1/rin suppresses eye degeneration in c9ALS/FTD fly models.** Fly  
253 eyes expressing  $(G_4C_2)_{30}$ ,  $(GR)_{36}$ , or  $(PR)_{36}$ , without (Ctrl) or with heterozygous loss of function  
254 of *rin*. Mean ± s.e.m. Student's t-tests; \*\*\*\*,  $p < 0.0001$ .

## 256 Discussion

257 Despite the importance of SGs in ALS/FTD pathogenesis, it is unclear how SG assembly is  
258 regulated at the cellular level and whether this regulation is related to pathomechanism. Here, we  
259 show that the ER stress/IRE1/JNK axis promotes SG formation caused by R-DPRs and contributes

260 to neurodegeneration in animal and cellular models of c9ALS/FTD. Mechanistically, activated  
261 JNK promotes the *G3BP1* transcription, likely by phosphorylating H3S10, thereby increasing the  
262 G3BP1 protein level (**Fig. 8**). Together, our findings suggest a novel pathway regulating SG  
263 formation, which contributes to ALS/FTD pathogenesis.

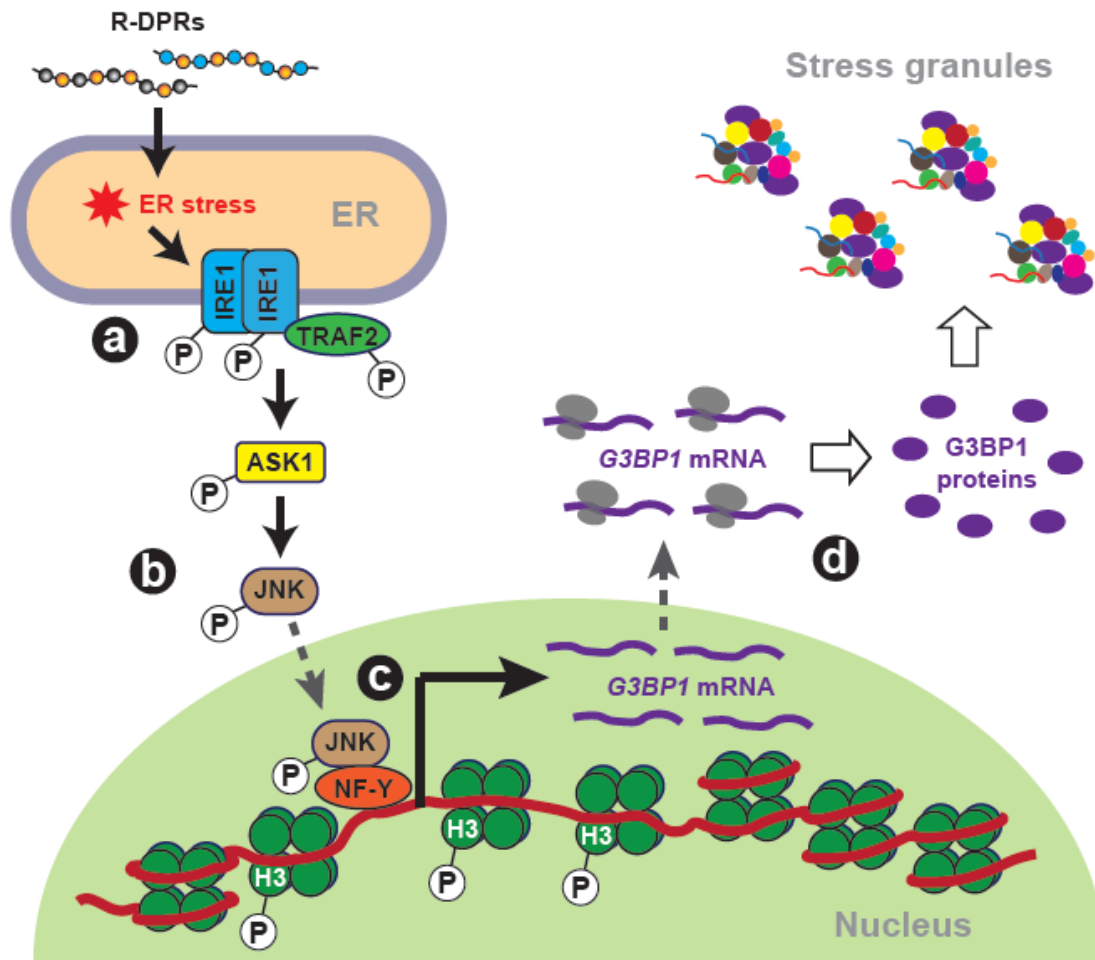

264

265 **Figure 8: Schematic representation of ER stress/JNK promoting SG assembly in**  
266 **c9ALS/FTD.** (a) R-DPRs induce ER stress, activating IRE1 and TRAF2. (b) Activated  
267 IRE1/TRAF2 complex activates ASK1, which subsequently activates JNK via phosphorylation.  
268 (c) Activated JNK translocates to the nucleus and, together with NF-Y, localizes to the promoter  
269 region of *G3BP1*, where it phosphorylates H3 at Serine10. H3S10 phosphorylation relaxes DNA,  
270 allowing NF-Y-mediated transactivation of *G3BP1*. (d) G3BP1 protein level is upregulated,  
271 causing SG assembly.

272 How JNK promotes G3BP1 transcription is unclear. A previous study showed that in mice  
273 neurons, the transcription factor complex nuclear factor Y (NF-Y) and active JNK are recruited to

274 promoter regions of some genes, including *G3BPI* (Tiwari et al., 2011), where activated JNK  
275 phosphorylates H3S10, thereby allowing NF-Y-mediated *G3BPI* transactivation (**Fig. 8**). Future  
276 studies can test this model in U-2 OS and iPSN models of c9ALS/FTD.

277 When overexpressed, R-DPRs induce SGs in cells over a 24-48 hour period (Boeynaems et  
278 al., 2017; K. H. Lee et al., 2016) (and **Fig. 4** and **Supplementary Fig. 2**), whereas many stressors,  
279 e.g., arsenite, induces SGs within an hour. Previous studies on SG assembly mechanisms mostly  
280 focus on the latter, i.e., SGs induced by short-term stress (Jain et al., 2016; Kedersha et al., 2016;  
281 P. Yang et al., 2020). Some of the identified mechanisms are verified in SGs induced by long-term  
282 stress, e.g., eIF2 $\alpha$  phosphorylation is required in both arsenite and R-DPR-induced SG formation  
283 (Boeynaems et al., 2017; K. Zhang et al., 2018). However, the uniqueness of long-term-stress-  
284 induced SG formation is unclear. Here, we show that JNK promotes SG formation induced by R-  
285 DPRs, but not one-hour treatment of arsenite, suggesting a mechanism specifically for long-term-  
286 stress-induced SG formation. This specificity likely comes from the ability of JNK to cause  
287 transcriptional changes, which, compared to posttranslational modifications, are more likely  
288 implicated in long-term stress responses (Q. Zhang et al., 2015).

289 Previous studies identified critical roles of the MAPK/JNK pathway in stress responses and  
290 neurodegeneration, including ALS. It induces apoptosis in a mouse model of SOD1-mediated ALS  
291 (S. Lee et al., 2016), causes energy deficiencies in a mouse model of Wallerian degeneration (J.  
292 Yang et al., 2015), and disrupts lipid metabolism due to mitochondrial oxidative stress in fly and  
293 mouse models (L. Liu et al., 2015). Our finding that JNK promotes SG formation in cellular models  
294 of c9ALS/FTD identifies a novel route by which this pathway contributes to stress responses and  
295 neurodegeneration, suggesting a broader role of MAPK/JNK.

296 In addition to the MAPK/JNK pathway, other pathways and processes are also known to  
297 contribute to SG formation, and targeting some of these pathways/processes suppresses  
298 neurodegeneration or cytotoxicity in ALS/FTD models (Becker et al., 2017; Gilks et al., 2004;  
299 Jain et al., 2016; Kedersha et al., 2016; Kedersha et al., 2008; Ohn et al., 2008; K. Zhang et al.,  
300 2018). However, the complex network regulating SG formation in cells is far from understood.  
301 Mass spectrometry analyses identified ~400 proteins in yeast and mammalian SGs (Jain et al.,  
302 2016), and genetic screens identified more than 300 genes whose loss limits or reduces arsenite-  
303 induced SG formation in U-2 OS cells (Ohn et al., 2008; P. Yang et al., 2020). For most of these  
304 proteins/genes, how they contribute to SG formation and whether they are implicated in ALS/FTD  
305 pathogenesis is unclear. Future studies addressing these questions will provide a better  
306 understanding of SG biology and potentially identify novel therapeutic targets for the diseases.

## 307 **Materials and Methods**

### 308 **IPSC culture and motor neuron differentiation**

309 IPSC lines from C9orf72 patients and non-neurological controls were obtained from Cedars-Sinai  
310 Stem cell Core (patient demographics are provided in **Supplementary Table 1**). IPSCs were  
311 differentiated into direct induced motor neurons (diMNs) using a previously published protocol  
312 (A. N. Coyne et al., 2020). Briefly, iPSCs were grown in mTeSR media on Matrigel (Corning)-  
313 coated 10 cm dishes for two weeks before differentiation. At 40% confluency, iPSC colonies were  
314 cultured in Stage 1 media containing IMDM 47.5% (Gibco), 47.5% F12, 1% NEAA (Gibco), 1%  
315 Pen/Strep (Gibco), 2% B27 (Gibco), 1% N2 (Gibco), 0.2  $\mu$ M LDN193189 (Stemgent), 10  $\mu$ M  
316 SB431542 (StemCell Technologies), and 3  $\mu$ M CHIR99021 (Sigma Aldrich) for six days. On Day  
317 6, colonies were passaged with accutase (EMD Millipore) and re-plated on Matrigel-coated 6-well

318 plates. Cells were cultured in Stage 2 media containing IMDM 47.5% (Gibco), 47.5% F12, 1%  
319 NEAA (Gibco), 1% Pen/Strep (Gibco), 2% B27 (Gibco), 1% N2 (Gibco), 0.2  $\mu$ M LDN193189  
320 (Stemgent), 10  $\mu$ M SB431542 (StemCell Technologies), and 3  $\mu$ M CHIR99021 (Sigma Aldrich),  
321 0.1  $\mu$ M all-trans RA (Sigma Aldrich), and 1  $\mu$ M SAG (Cayman Chemicals) until Day 12. On day  
322 12, cells were trypsinized (GenClone) and replated on Matrigel-coated 24-well plates for imaging  
323 or 6-well plates for biochemistry. Cells were cultured in Stage 3 media containing IMDM 47.5%  
324 (Gibco), 47.5% F12, 1% NEAA (Gibco), 1% Pen/Strep (Gibco), 2% B27 (Gibco), 1% N2 (Gibco),  
325 0.1  $\mu$ M Compound E (Millipore), 2.5  $\mu$ M DAPT (Sigma Aldrich), 0.1  $\mu$ M db-cAMP (Millipore),  
326 0.5  $\mu$ M all-trans RA (Sigma Aldrich), 0.1  $\mu$ M SAG (Cayman Chemicals), 200 ng/mL Ascorbic  
327 Acid (Sigma Aldrich), 10 ng/mL BDNF (PeproTech), 10 ng/mL GDNF (PeproTech) until day 32.  
328 All cells were maintained at 37°C and 5% CO<sub>2</sub>.

### 329 **Propidium iodide (PI) staining**

330 Day 32 diMNs were treated with 1  $\mu$ g/mL of PI (Invitrogen) and one drop of NucBlue (Invitrogen)  
331 along with the media and incubated at 37°C and 5% CO<sub>2</sub> for 30 min. Images were acquired using  
332 a Zeiss LSM 900 confocal microscope (Carl Zeiss) with an AxioCam 512 color camera and related  
333 software. For each condition, 10-15 images were taken.

### 334 ***Drosophila* genetics**

335 *Drosophila* were raised on yeast-cornmeal-molasses food at 25°C. All RNAi fly stocks were  
336 procured from Bloomington Drosophila Stock Centre.

337 For eye degeneration assay, *GMR-Gal4*, *UAS-(G<sub>4</sub>C<sub>2</sub>)<sub>30</sub>/CyO* were crossed to Canton-S flies or  
338 *UAS-RNAi*, and *GMR-Gal4*, *UAS-(G<sub>4</sub>C<sub>2</sub>)<sub>30</sub>/+*; *UAS-RNAi (II or III)* and *GMR-Gal4*, *UAS-30R/+*  
339 were selected and aged at 27°C for 12 days. The external morphology of degenerated eyes was

340 scored using a previously published method (G. P. Ritson et al., 2010). Briefly, points were added  
341 for necrotic patches, loss of bristles, retinal collapse, loss of ommatidial structure, and  
342 depigmentation of the eye. Both the eyes were scored and the individual scores were combined to  
343 give a total ‘degeneration score’ in the range of 0-20. Eye images were captured using a ZEISS  
344 SteREO Discovery.V8 microscope (Carl Zeiss) with Axiocam 512 color camera and related  
345 software.

346 For the lethality assay, male flies from *OK371-Gal4; UAS-(G<sub>4</sub>C<sub>2</sub>)<sub>30</sub>/Gal80, TM6* were crossed to  
347 virgin female Canton-S or *UAS-RNAi* flies at 25°C, and parent flies were removed after three days.  
348 After 15 days, non-tubby offspring, i.e. *OK371-Gal4/+; UAS-(G<sub>4</sub>C<sub>2</sub>)<sub>30</sub>/+; UAS-RNAi (II/III)/+*,  
349 was scored as either fully eclosed (live) or pharate lethal (unable to eclose).

350 For *bsk/JNK* activity in flies, male flies from *OK371-Gal4* or *OK371-Gal4; UAS-(G<sub>4</sub>C<sub>2</sub>)<sub>30</sub>/Gal80,*  
351 *TM6* were crossed to virgin female flies from *puc-LacZ/TM6*. Third instar larvae of the offspring  
352 *OK371-Gal4/+; +/puc-LacZ* or *OK371-Gal4/+; UAS-(G<sub>4</sub>C<sub>2</sub>)<sub>30</sub>/puc-LacZ* were collected and their  
353 ventral nerve cords were dissected and subsequently stained.

354 For *Xbp1-EGFP* expression in flies, male flies from *OK371-Gal4* or *OK371-Gal4; UAS-*  
355 *(G<sub>4</sub>C<sub>2</sub>)<sub>30</sub>/Gal80, TM6* were crossed to virgin female flies from *Xbp1-EGFP*. Third instar larvae of  
356 the offspring *OK371-Gal4/+; +/Xbp1-EGFP* or *OK371-Gal4/+; UAS-(G<sub>4</sub>C<sub>2</sub>)<sub>30</sub>/Xbp1-EGFP*  
357 were collected and VNC was dissected and stained.

### 358 **Cell culture**

359 U2-OS cells (ATCC, HTB-96) were grown in DMEM (Gibco) supplemented with 10% fetal  
360 bovine serum (Gibco) and 1% penicillin-streptomycin and maintained at 37°C in a humidified  
361 incubator supplemented with 5% CO<sub>2</sub>. Transfections were performed using Lipofectamine 3000

362 (Invitrogen) reagent as per the manufacturer's protocol. 48 h post-transfection, cells were either  
363 fixed and immunostained or lysed for immunoblot.

### 364 **Immunofluorescent staining**

365 Fly VNCs were fixed with 3.7% formaldehyde for 20 minutes and penetrated in 0.4% PBX (PBS  
366 with 0.4% Triton X-100) for 1 hr at room temperature. Tissues were stained with primary  
367 antibodies anti-LacZ (DHSB, 40-1a, AB\_528100, ) and anti-elav (DHSB, 7E8A10) in 0.4% PBX  
368 and 10% donkey serum (DS) overnight. After that, VNCs were washed three times in 0.4% PBX  
369 (20 min each) and incubated with secondary antibodies conjugated to Alexa Fluor 488 and 568  
370 (Thermo Scientific) in 0.4% PBX containing 10% DS. All primary antibodies were used at 1:200  
371 dilutions and secondary antibodies were used at 1:1000 dilutions. Tissues were washed three times  
372 with 0.4% PBX (20 min each) and mounted on a coverslip using Prolong antifade Gold mountant  
373 (Invitrogen) along with DAPI.

374 U-2 OS cells or iPSNs were fixed with 4% paraformaldehyde for 20 min followed by penetration  
375 in 0.1% PBX (PBS with 0.1% Triton X-100) for 20 min at room temperature. For iPSNs, 0.3%  
376 PBX was used. Cells were blocked with 3% donkey serum (DS) followed by overnight incubation  
377 with primary antibodies in 0.1% TBST (TBS with 0.1% Tween-20) containing 3% DS. Primary  
378 antibodies were used as follows: G3BP1 (Abcam, 181149), G3BP2 (ProteinTech, 16276-1-AP,  
379 AB\_2878237) and TIA1 (ProteinTech, 12133-2-AP, AB\_2201427 ), at 1:200 dilutions. Cells were  
380 washed three times with TBST (20 min each) followed by incubation with secondary antibodies  
381 conjugated to either Alexa Fluor 488, 568, or 647 (1:1000 dilution) in TBST and 3% DS. After  
382 that, cells were washed thrice with TBST (20 min each) and mounted using Prolong antifade Gold  
383 mountant (Thermo Scientific).

384 Images were acquired using Zeiss LSM900 confocal microscope (Carl Zeiss) with an Axiocam  
385 512 color camera and related software.

### 386 **Plasmid source and construction**

387 The mCherry plasmid was procured from Addgene, and (GR)<sub>100</sub>-mCherry was a gift from Dr.  
388 Yong-Jie Zhang (Cook et al., 2020). To generate the mCherry-tagged poly-PR expression plasmid,  
389 the BioID sequence in myc-BioID-(PR)<sub>x100</sub> (F. L. Liu et al., 2022) was replaced with a  
390 NdeI/BamHI fragment encoding mCherry followed by a flexible linker (mCherry-GGSx3).

### 391 **Drug treatments**

392 U2-OS cells were treated with JNK inhibitor SP600125 (50  $\mu$ M) (Selleck Chemicals) for 24 h or  
393 with IRE1 inhibitor 4 $\mu$ 8C (50  $\mu$ M) (Selleck Chemicals) for 6 h and incubated at 37°C.

394 For iPSNs, day 32 diMNs were stressed with 5  $\mu$ M of tunicamycin (Sigma Aldrich) and co-treated  
395 with either DMSO or 25-50  $\mu$ M JNK inhibitor (SP600125) or 25-50  $\mu$ M IRE1 inhibitor (4 $\mu$ 8C)  
396 for 24 h.

### 397 **Western blot, immunoblot**

398 U2-OS and iPSNs were lysed in Laemmli buffer and heated to 98°C for 15 min. The protein  
399 samples were separated using 4-15% SDS mini-PROTEAN TGX precast gels (Bio-Rad) and  
400 transferred to 0.45  $\mu$ m nitrocellulose membranes (Bio-Rad). For dot blots, samples were directly  
401 blotted on the nitrocellulose membrane and air-dried for 20 min. Blots were blocked with 5% milk  
402 for 1 hr and incubated overnight with the primary antibody (1:1000 dilution, for actin 1:5000) in  
403 0.1% TBST containing 5% milk. Primary antibodies were used as follows: JNK (Cell Signaling,  
404 9252S, AB\_2250373, ), phospho-JNK (Cell Signaling, 9251S, AB\_331659 ), H3 (Cell signaling,



405 9715S, AB\_331563, ), phospho-H3S10 (Cell Signaling, 9706S, AB\_331748 ), IRE1 (Cell  
406 Signaling, 3294S, AB\_823545, ), phospho-IRE1 (Abcam, ab48187, AB\_873899 ), TRAF2 (Cell  
407 Signaling, 4724S, AB\_2209845, ), phospho-TRAF2 (Cell signaling, 13908S, AB\_2798342),  
408 G3BP1 (Abcam, 181149), G3BP2 (ProteinTech, 16276-1-AP, AB\_2878237) and TIA1  
409 (ProteinTech, 12133-2-AP, AB\_2201427 ) at 1:1000 dilutions and actin (EMD Millipore,  
410 MAB1501, AB\_2223041, ), mCherry (Abcam, ab167453, AB\_2571870, ) at 1:5000 dilutions.  
411 Blots were washed with TBST followed by incubation with HRP conjugated secondary antibodies  
412 in TBST and 5% milk (1:5000 dilution). For mCherry dot blots, bovine serum albumin (BSA) was  
413 used for blocking instead of milk. Chemiluminescent substrate WesternLigntning Plus-ECL  
414 (PerkinElmer) was used for detection. Images were captured using the iBright™ FL1500 Imaging  
415 system (Thermo Fischer Scientific).

#### 416 **MTT assay**

417 U2-OS cells were incubated with media containing MTT (1 mg/mL) at 37°C for 4 h. After that,  
418 media was removed and cells were lysed using DMSO, and absorbance was measured at 570 nm  
419 using A Tecan Spark multimode microplate reader.

#### 420 **PCR**

421 RNA was isolated from cells using Trizol reagent (Invitrogen) following the manufacturer's  
422 protocol. Reverse transcription was done using the SuperScript IV First-Strand Synthesis kit  
423 (Invitrogen). Quantitative PCR was done using SYBR-Green Master mix using Applied Biosystem  
424 Quant Studio 7. Following primers were used: for *GAPDH* forward 5'-  
425 GTTCGACAGTCAGCCGCATC-3', reverse 5'-GGAATTTGCCATGGGTGGA3-'; for *G3BP1*  
426 forward 5'-GTCCTTAGCAACAGGCCCAT-3', reverse 5'-TTATCTCGTCGGTCGCCTTC-3'.

427 To analyze *XBPI* alternative splicing events, cDNA was amplified using DreamTaq PCR mix  
428 (Invitrogen) and separated on 2.5% agarose gel (MetaPhor agarose, Lonza). Following primers  
429 were used: *XBPI* forward 5'-TTACGAGAGAAAACCT CATGGC-3', reverse 5'-GGGTCCAAG  
430 TTGTCCAGAATG C-3'.

#### 431 **Quantification and Statistical analysis**

432 Western blots were quantified using FIJI-just ImageJ. For SG counts and PI staining, at least 300  
433 cells were counted. The data are presented as Mean  $\pm$  SEM. Statistical analysis was done using  
434 paired or unpaired Student's t-test, one-way ANOVA with Dunnett's test, and Chi-square test  
435 using GraphPad Prism version 8 (GraphPad) as described in figure legends. \*  $p < 0.05$ , \*\*  $p <$   
436  $0.01$ , \*\*\*  $p < 0.001$ , \*\*\*\*  $p < 0.0001$ .

#### 437 **Acknowledgments**

438 We thank Yong-Jie Zhang and Karen Jansen-West for the constructs. Bloomington Drosophila  
439 Stock Center (NIH P40OD018537, fly stocks). Funding support: K.Z., NIH-NINDS/NIA  
440 (R01NS117461), DoD (W81XWH-21-1-0082), Target ALS, and the Frick Foundation for ALS.

#### 441 **Competing interests**

442 The authors declare no competing interests.

#### 443 **Supplementary figures:**

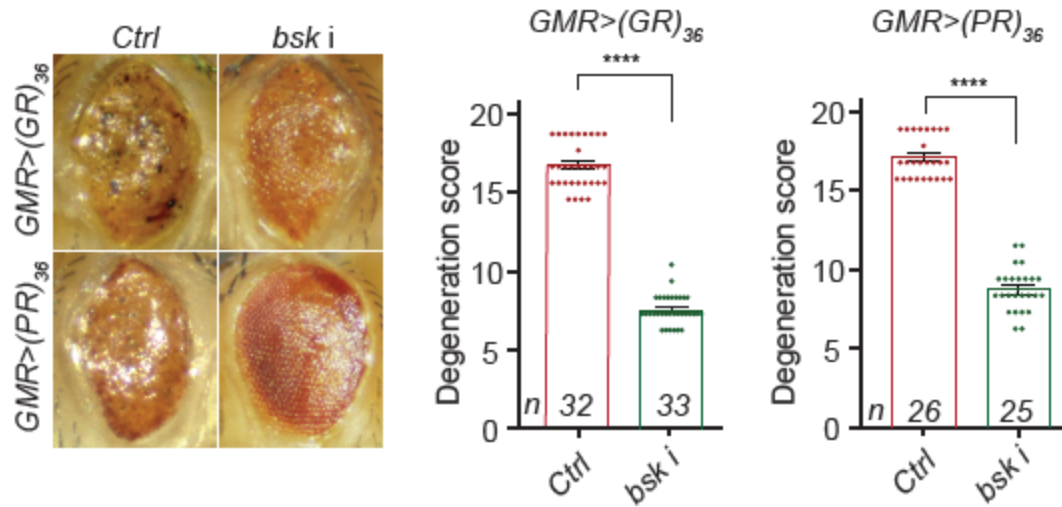

444

445 **Supplementary figure 1: Loss of *bsk* suppresses R-DPR-mediated eye degeneration in flies.**

446 Fly eyes expressing (GR)<sub>36</sub> or (PR)<sub>36</sub> using GMR-GAL4, without (control, Ctrl) or with co-

447 expressing *bsk* i. Student's t-test; \*\*\*\*: p<0.0001

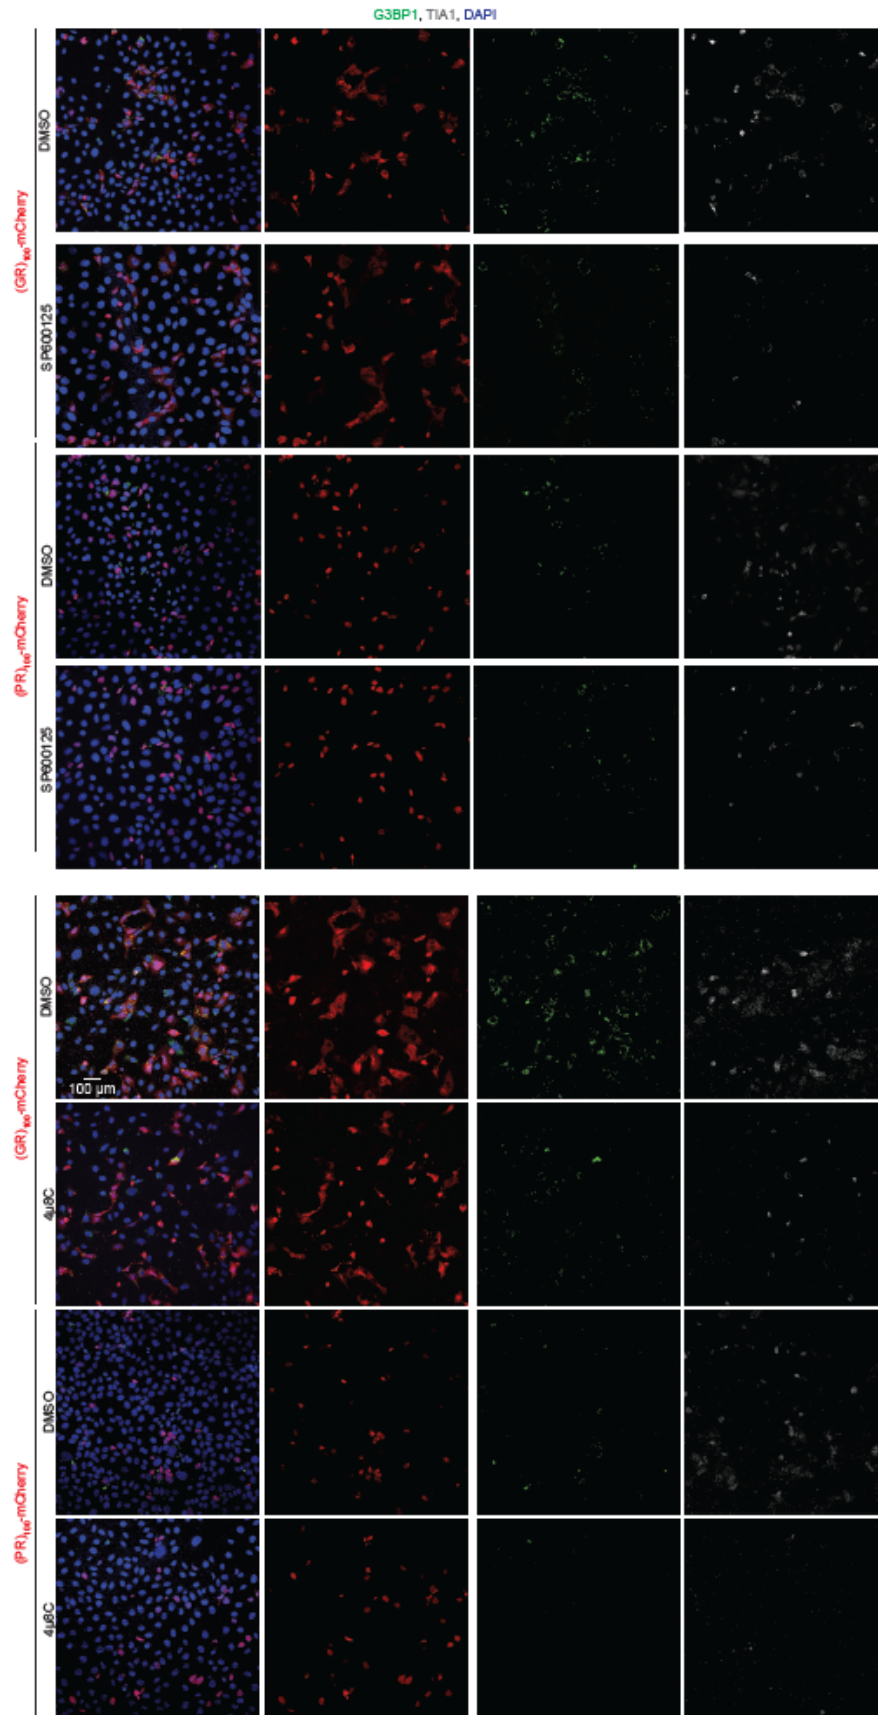

449 **Supplementary figure 2: Large views of Fig. 4.** U-2 OS cells expressing (GR/PR)<sub>100</sub>-mCherry  
 450 (red) treated with DMSO, 50 μM SP600125, or 50 μM 4μ8C and stained with G3BP1 (green),  
 451 TIA1 (white), and DAPI (blue).

452

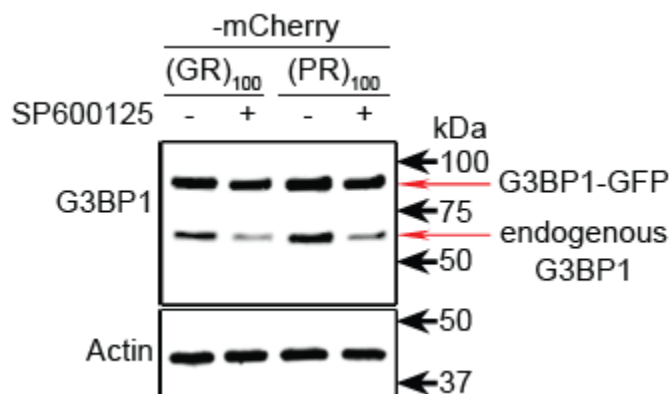

453

454 **Supplementary figure 3: JNK regulates endogenous G3BP1.** Western blots of lysates from U-  
 455 2 OS cells stably expressing a G3BP1-GFP under a lentiviral promoter and transiently expressing  
 456 (GR/PR)<sub>100</sub>-mCherry, treated with DMSO or 50 μM inhibitor SP600125.

457

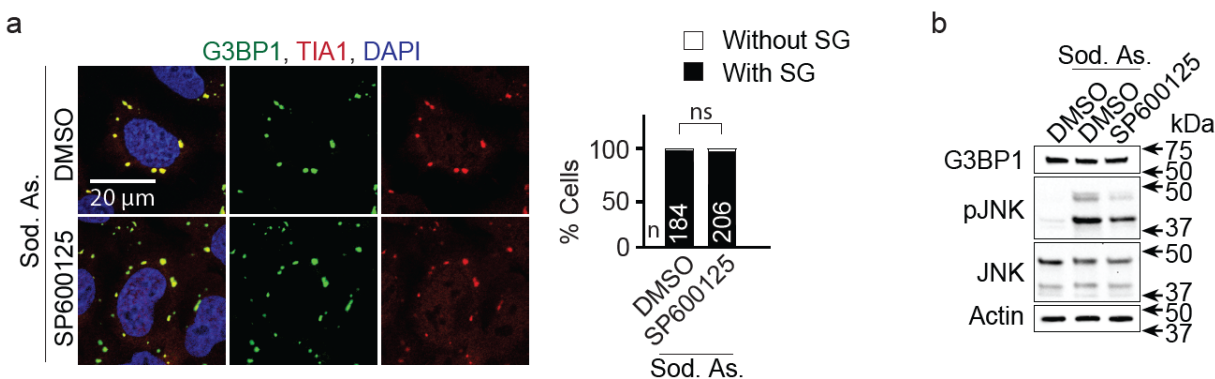

458 **Supplementary figure 4: JNK does not promote arsenite-induced SG formation.** (a) U-2 OS  
 459 cells treated with 0.5 mM sodium arsenite (Sod. As.) together with DMSO or 50 μM SP600125  
 460 for 1 h and stained with G3BP1 (green), TIA1 (red), and DAPI (blue). Quantification shows  
 461 percent of cells with or without SGs. Mean ± s.e.m.  $\chi^2$ -test. ns, not significant. (b) Western blots  
 462 of lysates from U-2 OS cells treated with 0.5 mM sodium arsenite together with DMSO or 50 μM  
 463 SP600125 for 1 h.  
 464

465

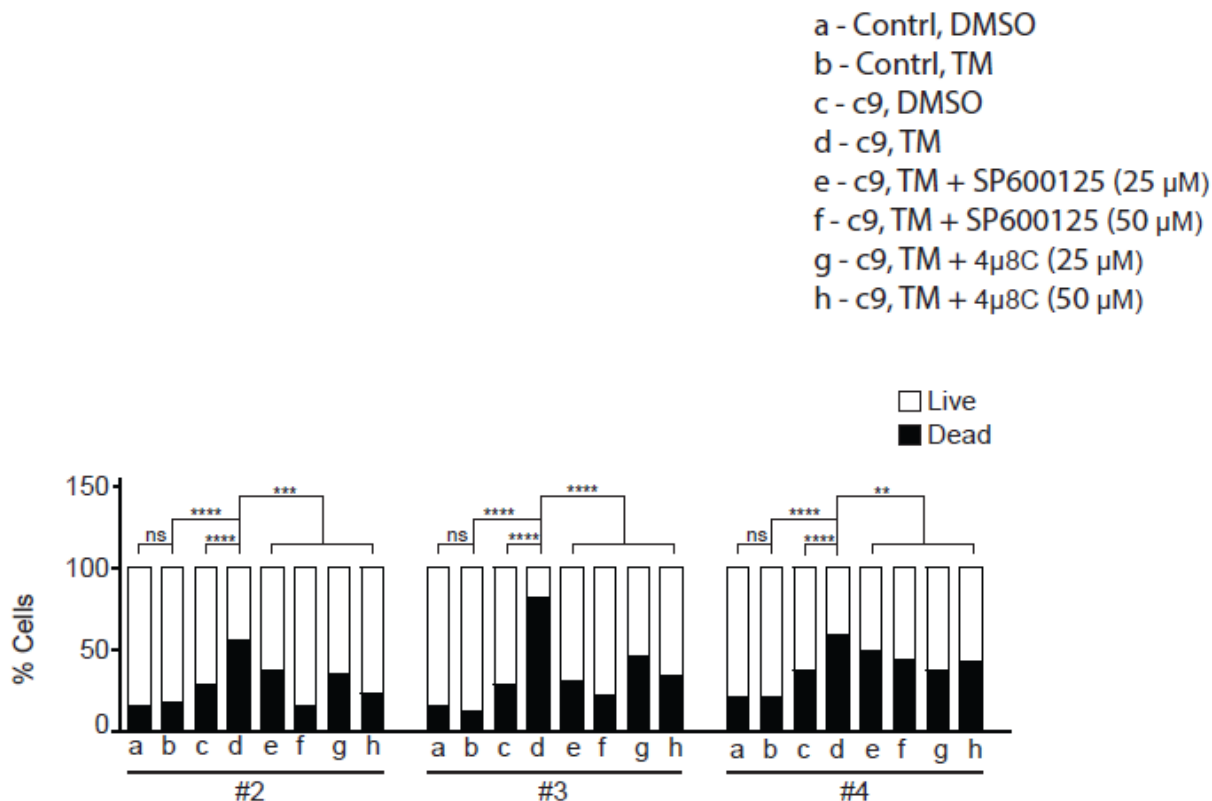

466  
 467 **Supplementary figure 5: Inhibition of JNK or ER stress suppresses toxicity in multiple**  
 468 **c9ALS/FTD iPSN lines.** Control (Ctrl) or c9ALS/FTD (c9) Line #2, #3 and #4 iPSNs treated  
 469 with 5  $\mu$ M tunicamycin (TM) together with DMSO, SP600125, or 4 $\mu$ 8C and stained with propidine  
 470 iodide (PI, dead cells) and NucBlue (all cells). Quantification shows percent of live and dead cells.  
 471  $\chi^2$ -test. \*\*\*\*:  $p < 0.0001$ ; \*\*\*:  $p < 0.001$ ; \*\*:  $p < 0.01$ ; ns, not significant.

472  
 473  
 474  
 475  
 476  
 477  
 478  
 479  
 480  
 481

482 **Supplementary Table 1: Demographics of patients whose iPSCs were used in this study**

| Cell line name | Source      | Sex    | Age at the time of collection | Disease/Type | Mutation    | Origin |
|----------------|-------------|--------|-------------------------------|--------------|-------------|--------|
| CS9XH7iCTR-nxx | Cedar Sinai | Male   | 53                            | Control      | -           | PBMC   |
| CS8PAAiCTR-nxx | Cedar Sinai | Female | 58                            | Control      | -           | PBMC   |
| EDi036-A       | Cedar Sinai | Female | 79                            | Control      | -           | PBMC   |
| EDi043-A       | Cedar Sinai | Male   | 80                            | Control      | -           | PBMC   |
| CS8KT3iALS-nxx | Cedar Sinai | Male   | 60                            | ALS          | C9orf72 HRE | PBMC   |
| CS7VCZiALS-nxx | Cedar Sinai | Male   | 64                            | ALS          | C9orf72 HRE | PBMC   |
| CS6ZLDiALS-nxx | Cedar Sinai | Female | Unknown                       | ALS          | C9orf72 HRE | PBMC   |
| CS0BUUiALS-nxx | Cedar Sinai | Female | 63                            | ALS          | C9orf72 HRE | PBMC   |

483

484 **Figure legends for source data:**

485 **Figure 1-source data 1:** Fly ventral nerve cord motor neurons expressing puc-lacZ without  
486 ( $G_4C_2$ )<sub>30</sub>, stained with lacZ (red), Elav (a neuronal marker, green), and DAPI (blue).

487 **Figure 1-source data 2:** Magnified inner image of fly ventral nerve cord motor neurons  
488 expressing puc-lacZ without ( $G_4C_2$ )<sub>30</sub>, stained with lacZ (red), Elav (a neuronal marker, green),  
489 and DAPI (blue).

490 **Figure 1-source data 3:** Fly ventral nerve cord motor neurons expressing puc-lacZ with co-  
491 expressing ( $G_4C_2$ )<sub>30</sub>, stained with lacZ (red), Elav (a neuronal marker, green), and DAPI (blue).

492 **Figure 1-source data 4:** Magnified inner image of fly ventral nerve cord motor neurons  
493 expressing puc-lacZ with co-expressing (G<sub>4</sub>C<sub>2</sub>)<sub>30</sub>, stained with lacZ (red), Elav (a neuronal marker,  
494 green), and DAPI (blue).

495 **Figure 2-source data 1:** Fly VNC motor neurons expressing Xbp1-GFP without (G<sub>4</sub>C<sub>2</sub>)<sub>30</sub>,  
496 stained with Elav (a neuronal marker, red) and DAPI (blue).

497 **Figure 2-source data 2:** Fly VNC motor neurons expressing Xbp1-GFP with (G<sub>4</sub>C<sub>2</sub>)<sub>30</sub>, stained  
498 with Elav (a neuronal marker, red) and DAPI (blue).

499 **Figure 3-source data 1:** U-2 OS cells expressing mCherry or (GR/PR)<sub>100</sub>-mCherry (red) stained  
500 with pJNK (green) and DAPI (blue).

501 **Figure 3-source data 2:** Raw image of Western blots for lysates from U-2 OS cell expressing  
502 mCherry or (GR/PR)<sub>100</sub>-mCherry showing actin

503 **Figure 3-source data 3:** Raw image of Western blots for lysates from U-2 OS cell expressing  
504 mCherry or (GR/PR)<sub>100</sub>-mCherry showing IRE1

505 **Figure 3-source data 4:** Raw image of Western blots for lysates from U-2 OS cell expressing  
506 mCherry or (GR/PR)<sub>100</sub>-mCherry showing p-IRE1

507 **Figure 3-source data 5:** Raw image of Western blots for lysates from U-2 OS cell expressing  
508 mCherry or (GR/PR)<sub>100</sub>-mCherry showing TRAF2

509 **Figure 3-source data 6:** Raw image of Western blots for lysates from U-2 OS cell expressing  
510 mCherry or (GR/PR)<sub>100</sub>-mCherry showing p-TRAF2

511 **Figure 3-source data 7:** Raw image of Western blots for lysates from U-2 OS cell expressing  
512 mCherry or (GR/PR)<sub>100</sub>-mCherry showing JNK

513 **Figure 3-source data 8:** Raw image of Western blots for lysates from U-2 OS cell expressing  
514 mCherry or (GR/PR)<sub>100</sub>-mCherry showing pJNK

515 **Figure 3-source data 9:** Raw image of Western blots for lysates from U-2 OS cell expressing  
516 mCherry or (GR/PR)<sub>100</sub>-mCherry co-treated with DMSO or 4μ8C for 6 h showing actin

517 **Figure 3-source data 10:** Raw image of Western blots for lysates from U-2 OS cell expressing  
518 mCherry or (GR/PR)<sub>100</sub>-mCherry co-treated with DMSO or 4μ8C for 6 h showing JNK

519 **Figure 3-source data 11:** Raw image of Western blots for lysates from U-2 OS cell expressing  
520 mCherry or (GR/PR)<sub>100</sub>-mCherry co-treated with DMSO or 4μ8C for 6 h showing pJNK

521 **Figure 5-source data 1:** Raw image of Western blots of lysates from U-2 OS cells expressing  
522 (GR/PR)<sub>100</sub>-mCherry, treated with DMSO or 50 μM SP600125 showing actin



523 **Figure 5-source data 2:** Raw image of Western blots of lysates from U-2 OS cells expressing  
524 (GR/PR)<sub>100</sub>-mCherry, treated with DMSO or 50 μM SP600125 showing G3BP1

525 **Figure 5-source data 3:** Raw image of Western blots of lysates from U-2 OS cells expressing  
526 (GR/PR)<sub>100</sub>-mCherry, treated with DMSO or 50 μM SP600125 showing G3BP2

527 **Figure 5-source data 4:** Raw image of Western blots of lysates from U-2 OS cells expressing  
528 (GR/PR)<sub>100</sub>-mCherry, treated with DMSO or 50 μM SP600125 showing H3

529 **Figure 5-source data 5:** Raw image of Western blots of lysates from U-2 OS cells expressing  
530 (GR/PR)<sub>100</sub>-mCherry, treated with DMSO or 50 μM SP600125 showing p-H3S10

531 **Figure 5-source data 6:** Raw image of Western blots of lysates from U-2 OS cells expressing  
532 (GR/PR)<sub>100</sub>-mCherry, treated with DMSO or 50 μM SP600125 showing TIA1

533 **Figure 5-source data 7:** Raw image of Western blots of lysates from U-2 OS cells expressing  
534 (GR/PR)<sub>100</sub>-mCherry, treated with DMSO or 50 μM 4μ8C showing actin

535 **Figure 5-source data 8:** Raw image of Western blots of lysates from U-2 OS cells expressing  
536 (GR/PR)<sub>100</sub>-mCherry, treated with DMSO or 50 μM 4μ8C showing G3BP1

537 **Figure 5-source data 9:** Raw image of Western blots of lysates from U-2 OS cells expressing  
538 (GR/PR)<sub>100</sub>-mCherry, treated with DMSO or 50 μM 4μ8C showing G3BP2

539 **Figure 5-source data 10:** Raw image of Western blots of lysates from U-2 OS cells expressing  
540 (GR/PR)<sub>100</sub>-mCherry, treated with DMSO or 50 μM 4μ8C showing H3

541 **Figure 5-source data 11:** Raw image of Western blots of lysates from U-2 OS cells expressing  
542 (GR/PR)<sub>100</sub>-mCherry, treated with DMSO or 50 μM 4μ8C showing p-H3S10

543 **Figure 6-source data 1:** Raw image of Western blot of c9 lysates treated with 5 μM  
544 tunicamycin (TM) together with DMSO, JNK inhibitor SP600125, or IRE1 inhibitor 4μ8C  
545 showing actin

546 **Figure 6-source data 2:** Raw image of Western blot of c9 lysates treated with 5 μM  
547 tunicamycin (TM) together with DMSO, JNK inhibitor SP600125, or IRE1 inhibitor 4μ8C  
548 showing G3BP1

549 **Supplementary Figure 3-source data 1:** Raw image of Western blots of lysates from U-2 OS  
550 cells stably expressing a G3BP1-GFP under a lentiviral promoter and transiently expressing  
551 (GR/PR)<sub>100</sub>-mCherry, treated with DMSO or 50 μM inhibitor SP600125 showing G3BP1

552 **Supplementary Figure 4-source data 1:** U-2 OS cells treated with 0.5 mM sodium arsenite  
553 (Sod. As.) together with DMSO for 1 h and stained with G3BP1 (green), TIA1 (red), and DAPI  
554 (blue).

555 **Supplementary Figure 4-source data 2:** U-2 OS cells treated with 0.5 mM sodium arsenite  
556 (Sod. As.) together with 50  $\mu$ M SP600125 for 1 h and stained with G3BP1 (green), TIA1 (red),  
557 and DAPI (blue).

558 **Supplementary Figure 4-source data 3:** Raw image for Western blots of lysates from U-2 OS  
559 cells treated with 0.5 mM sodium arsenite together with DMSO or 50  $\mu$ M SP600125 for 1 h  
560 showing JNK

561 **Supplementary Figure 4-source data 4:** Western blots of lysates from U-2 OS cells treated with  
562 0.5 mM sodium arsenite together with DMSO or 50  $\mu$ M SP600125 for 1 h showing pJNK

563 **Supplementary Figure 4-source data 5:** Western blots of lysates from U-2 OS cells treated with  
564 0.5 mM sodium arsenite together with DMSO or 50  $\mu$ M SP600125 for 1 h showing G3BP1

565

## 566 **References:**

- 567 Allis, C. D., & Jenuwein, T. (2016). The molecular hallmarks of epigenetic control. *Nat Rev Genet*, *17*(8),  
568 487-500. doi:10.1038/nrg.2016.59
- 569 Anderson, P., & Kedersha, N. (2008). Stress granules: the Tao of RNA triage. *Trends Biochem. Sci*, *33*(3),  
570 141-150. doi:S0968-0004(08)00026-1 [pii];10.1016/j.tibs.2007.12.003 [doi]
- 571 Ash, P. E., Bieniek, K. F., Gendron, T. F., Caulfield, T., Lin, W. L., DeJesus-Hernandez, M., . . . Petrucelli, L.  
572 (2013). Unconventional translation of C9ORF72 GGGGCC expansion generates insoluble  
573 polypeptides specific to c9FTD/ALS. *Neuron*, *77*(4), 639-646. doi:S0896-6273(13)00135-9  
574 [pii];10.1016/j.neuron.2013.02.004 [doi]
- 575 Becker, L. A., Huang, B., Bieri, G., Ma, R., Knowles, D. A., Jafar-Nejad, P., . . . Gitler, A. D. (2017). Therapeutic  
576 reduction of ataxin-2 extends lifespan and reduces pathology in TDP-43 mice. *Nature*, *544*(7650),  
577 367-371. doi:nature22038 [pii];10.1038/nature22038 [doi]
- 578 Boeynaems, S., Bogaert, E., Kovacs, D., Konijnenberg, A., Timmerman, E., Volkov, A., . . . Van Den Bosch,  
579 L. (2017). Phase Separation of C9orf72 Dipeptide Repeats Perturbs Stress Granule Dynamics. *Mol.*  
580 *Cell*, *65*(6), 1044-1055. doi:S1097-2765(17)30128-4 [pii];10.1016/j.molcel.2017.02.013 [doi]
- 581 Cheng, W., Wang, S., Mestre, A. A., Fu, C., Makarem, A., Xian, F., . . . Sun, S. (2018). C9ORF72 GGGGCC  
582 repeat-associated non-AUG translation is upregulated by stress through eIF2alpha  
583 phosphorylation. *Nat Commun*, *9*(1), 51. doi:10.1038/s41467-017-02495-z
- 584 Cook, C. N., Wu, Y., Odeh, H. M., Gendron, T. F., Jansen-West, K., Del Rosso, G., . . . Petrucelli, L. (2020).  
585 C9orf72 poly(GR) aggregation induces TDP-43 proteinopathy. *Sci Transl Med*, *12*(559).  
586 doi:10.1126/scitranslmed.abb3774
- 587 Coyne, A. N., Yamada, S. B., Siddegowda, B. B., Estes, P. S., Zaepfel, B. L., Johannesmeyer, J. S., . . . Zarnescu,  
588 D. C. (2015). Fragile X protein mitigates TDP-43 toxicity by remodeling RNA granules and restoring  
589 translation. *Hum. Mol. Genet*, *24*(24), 6886-6898. doi:ddv389 [pii];10.1093/hmg/ddv389 [doi]
- 590 Coyne, A. N., Zaepfel, B. L., Hayes, L., Fitchman, B., Salzberg, Y., Luo, E. C., . . . Rothstein, J. D. (2020). G4C2  
591 Repeat RNA Initiates a POM121-Mediated Reduction in Specific Nucleoporins in C9orf72 ALS/FTD.  
592 *Neuron*, *107*(6), 1124-1140 e1111. doi:10.1016/j.neuron.2020.06.027

- 593 Cross, B. C., Bond, P. J., Sadowski, P. G., Jha, B. K., Zak, J., Goodman, J. M., . . . Harding, H. P. (2012). The  
594 molecular basis for selective inhibition of unconventional mRNA splicing by an IRE1-binding small  
595 molecule. *Proc Natl Acad Sci U S A*, *109*(15), E869-878. doi:10.1073/pnas.1115623109
- 596 Cunningham, K. M., Maulding, K., Ruan, K., Senturk, M., Grima, J. C., Sung, H., . . . Lloyd, T. E. (2020).  
597 TFEB/Mitf links impaired nuclear import to autophagolysosomal dysfunction in C9-ALS. *Elife*, *9*.  
598 doi:10.7554/eLife.59419
- 599 Dafinca, R., Scaber, J., Ababneh, N., Lalic, T., Weir, G., Christian, H., . . . Talbot, K. (2016). C9orf72  
600 Hexanucleotide Expansions Are Associated with Altered Endoplasmic Reticulum Calcium  
601 Homeostasis and Stress Granule Formation in Induced Pluripotent Stem Cell-Derived Neurons  
602 from Patients with Amyotrophic Lateral Sclerosis and Frontotemporal Dementia. *Stem Cells*, *34*(8),  
603 2063-2078. doi:10.1002/stem.2388 [doi]
- 604 Daigle, J. G., Lanson, N. A., Jr., Smith, R. B., Casci, I., Maltare, A., Monaghan, J., . . . Pandey, U. B. (2013).  
605 RNA-binding ability of FUS regulates neurodegeneration, cytoplasmic mislocalization and  
606 incorporation into stress granules associated with FUS carrying ALS-linked mutations. *Hum. Mol. Genet.*  
607 *22*(6), 1193-1205. doi:dds526 [pii];10.1093/hmg/dds526 [doi]
- 608 DeJesus-Hernandez, M., Mackenzie, I. R., Boeve, B. F., Boxer, A. L., Baker, M., Rutherford, N. J., . . .  
609 Rademakers, R. (2011). Expanded GGGGCC hexanucleotide repeat in noncoding region of  
610 C9ORF72 causes chromosome 9p-linked FTD and ALS. *Neuron*, *72*(2), 245-256. doi:S0896-  
611 6273(11)00828-2 [pii];10.1016/j.neuron.2011.09.011 [doi]
- 612 Deniz, A. A. (2020). Networking and Dynamic Switches in Biological Condensates. *Cell*, *181*(2), 228-230.  
613 doi:10.1016/j.cell.2020.03.056
- 614 Donnelly, C. J., Zhang, P. W., Pham, J. T., Haeusler, A. R., Mistry, N. A., Vidensky, S., . . . Rothstein, J. D.  
615 (2013). RNA toxicity from the ALS/FTD C9ORF72 expansion is mitigated by antisense intervention.  
616 *Neuron*, *80*(2), 415-428. doi:S0896-6273(13)00918-5 [pii];10.1016/j.neuron.2013.10.015 [doi]
- 617 Figley, M. D., Bieri, G., Kolaitis, R. M., Taylor, J. P., & Gitler, A. D. (2014). Profilin 1 associates with stress  
618 granules and ALS-linked mutations alter stress granule dynamics. *J. Neurosci*, *34*(24), 8083-8097.  
619 doi:34/24/8083 [pii];10.1523/JNEUROSCI.0543-14.2014 [doi]
- 620 Gendron, T. F., Bieniek, K. F., Zhang, Y. J., Jansen-West, K., Ash, P. E., Caulfield, T., . . . Petrucelli, L. (2013).  
621 Antisense transcripts of the expanded C9ORF72 hexanucleotide repeat form nuclear RNA foci and  
622 undergo repeat-associated non-ATG translation in c9FTD/ALS. *Acta Neuropathol*, *126*(6), 829-844.  
623 doi:10.1007/s00401-013-1192-8 [doi]
- 624 Gilks, N., Kedersha, N., Ayodele, M., Shen, L., Stoecklin, G., Dember, L. M., & Anderson, P. (2004). Stress  
625 granule assembly is mediated by prion-like aggregation of TIA-1. *Mol. Biol. Cell*, *15*(12), 5383-  
626 5398. doi:10.1091/mbc.E04-08-0715 [doi];E04-08-0715 [pii]
- 627 Guillen-Boixet, J., Kopach, A., Holehouse, A. S., Wittmann, S., Jahnel, M., Schlusser, R., . . . Franzmann, T.  
628 M. (2020). RNA-Induced Conformational Switching and Clustering of G3BP Drive Stress Granule  
629 Assembly by Condensation. *Cell*, *181*(2), 346-361 e317. doi:10.1016/j.cell.2020.03.049
- 630 Haeusler, A. R., Donnelly, C. J., Periz, G., Simko, E. A., Shaw, P. G., Kim, M. S., . . . Wang, J. (2014). C9orf72  
631 nucleotide repeat structures initiate molecular cascades of disease. *Nature*, *507*(7491), 195-200.  
632 doi:nature13124 [pii];10.1038/nature13124 [doi]
- 633 Jain, S., Wheeler, J. R., Walters, R. W., Agrawal, A., Barsic, A., & Parker, R. (2016). ATPase-Modulated Stress  
634 Granules Contain a Diverse Proteome and Substructure. *Cell*, *164*(3), 487-498. doi:S0092-  
635 8674(15)01702-X [pii];10.1016/j.cell.2015.12.038 [doi]
- 636 Kedersha, N., Panas, M. D., Achorn, C. A., Lyons, S., Tisdale, S., Hickman, T., . . . Anderson, P. (2016). G3BP-  
637 Caprin1-USP10 complexes mediate stress granule condensation and associate with 40S subunits.  
638 *J. Cell Biol*, *212*(7), 845-860. doi:jcb.201508028 [pii];10.1083/jcb.201508028 [doi]

- 639 Kedersha, N., Tisdale, S., Hickman, T., & Anderson, P. (2008). Real-time and quantitative imaging of  
640 mammalian stress granules and processing bodies. *Methods Enzymol*, *448*, 521-552. doi:S0076-  
641 6879(08)02626-8 [pii];10.1016/S0076-6879(08)02626-8 [doi]
- 642 Kim, E. K., & Choi, E. J. (2010). Pathological roles of MAPK signaling pathways in human diseases. *Biochim*  
643 *Biophys Acta*, *1802*(4), 396-405. doi:10.1016/j.bbadis.2009.12.009
- 644 Kwon, I., Xiang, S., Kato, M., Wu, L., Theodoropoulos, P., Wang, T., . . . McKnight, S. L. (2014). Poly-  
645 dipeptides encoded by the C9orf72 repeats bind nucleoli, impede RNA biogenesis, and kill cells.  
646 *Science*, *345*(6201), 1139-1145. doi:science.1254917 [pii];10.1126/science.1254917 [doi]
- 647 Lee, K. H., Zhang, P., Kim, H. J., Mitrea, D. M., Sarkar, M., Freibaum, B. D., . . . Taylor, J. P. (2016). C9orf72  
648 Dipeptide Repeats Impair the Assembly, Dynamics, and Function of Membrane-Less Organelles.  
649 *Cell*, *167*(3), 774-788. doi:S0092-8674(16)31383-6 [pii];10.1016/j.cell.2016.10.002 [doi]
- 650 Lee, S., Shang, Y., Redmond, S. A., Urisman, A., Tang, A. A., Li, K. H., . . . Huang, E. J. (2016). Activation of  
651 HIPK2 Promotes ER Stress-Mediated Neurodegeneration in Amyotrophic Lateral Sclerosis.  
652 *Neuron*, *91*(1), 41-55. doi:10.1016/j.neuron.2016.05.021
- 653 Li, Y. R., King, O. D., Shorter, J., & Gitler, A. D. (2013). Stress granules as crucibles of ALS pathogenesis. *J.*  
654 *Cell Biol*, *201*(3), 361-372. doi:jcb.201302044 [pii];10.1083/jcb.201302044 [doi]
- 655 Lin, Y., Mori, E., Kato, M., Xiang, S., Wu, L., Kwon, I., & McKnight, S. L. (2016). Toxic PR Poly-Dipeptides  
656 Encoded by the C9orf72 Repeat Expansion Target LC Domain Polymers. *Cell*, *167*(3), 789-802 e712.  
657 doi:10.1016/j.cell.2016.10.003
- 658 Lin, Y., Protter, D. S., Rosen, M. K., & Parker, R. (2015). Formation and Maturation of Phase-Separated  
659 Liquid Droplets by RNA-Binding Proteins. *Mol. Cell*, *60*(2), 208-219. doi:S1097-2765(15)00664-4  
660 [pii];10.1016/j.molcel.2015.08.018 [doi]
- 661 Ling, S. C., Polymenidou, M., & Cleveland, D. W. (2013). Converging mechanisms in ALS and FTD: disrupted  
662 RNA and protein homeostasis. *Neuron*, *79*(3), 416-438. doi:S0896-6273(13)00657-0  
663 [pii];10.1016/j.neuron.2013.07.033 [doi]
- 664 Liu, F. L., Morderer, D., Wren, M. C., Vettleson-Trutza, S. A., Wang, Y. Z., Rabichow, B. E., . . . Rossoll, W.  
665 (2022). Proximity proteomics of C9orf72 dipeptide repeat proteins identifies molecular  
666 chaperones as modifiers of poly-GA aggregation. *Acta Neuropathologica Communications*, *10*(1).  
667 doi:ARTN 22
- 668 10.1186/s40478-022-01322-x
- 669 Liu, L., Zhang, K., Sandoval, H., Yamamoto, S., Jaiswal, M., Sanz, E., . . . Bellen, H. J. (2015). Glial lipid  
670 droplets and ROS induced by mitochondrial defects promote neurodegeneration. *Cell*, *160*(1-2),  
671 177-190. doi:S0092-8674(14)01589-X [pii];10.1016/j.cell.2014.12.019 [doi]
- 672 Martin-Blanco, E., Gampel, A., Ring, J., Virdee, K., Kirov, N., Tolkovsky, A. M., & Martinez-Arias, A. (1998).  
673 puckered encodes a phosphatase that mediates a feedback loop regulating JNK activity during  
674 dorsal closure in *Drosophila*. *Genes & Development*, *12*(4), 557-570. doi:DOI  
675 10.1101/gad.12.4.557
- 676 Mizielska, S., Gronke, S., Niccoli, T., Ridler, C. E., Clayton, E. L., Devoy, A., . . . Isaacs, A. M. (2014). C9orf72  
677 repeat expansions cause neurodegeneration in *Drosophila* through arginine-rich proteins.  
678 *Science*, *345*(6201), 1192-1194. doi:science.1256800 [pii];10.1126/science.1256800 [doi]
- 679 Mori, K., Arzberger, T., Grasser, F. A., Gijssels, I., May, S., Rentzsch, K., . . . Edbauer, D. (2013).  
680 Bidirectional transcripts of the expanded C9orf72 hexanucleotide repeat are translated into  
681 aggregating dipeptide repeat proteins. *Acta Neuropathol*, *126*(6), 881-893. doi:10.1007/s00401-  
682 013-1189-3 [doi]
- 683 Mori, K., Weng, S. M., Arzberger, T., May, S., Rentzsch, K., Kremmer, E., . . . Edbauer, D. (2013). The C9orf72  
684 GGGGCC repeat is translated into aggregating dipeptide-repeat proteins in FTLD/ALS. *Science*,  
685 *339*(6125), 1335-1338. doi:science.1232927 [pii];10.1126/science.1232927 [doi]

- 686 Ohn, T., Kedersha, N., Hickman, T., Tisdale, S., & Anderson, P. (2008). A functional RNAi screen links O-  
687 GlcNAc modification of ribosomal proteins to stress granule and processing body assembly. *Nat.*  
688 *Cell Biol*, *10*(10), 1224-1231. doi:ncb1783 [pii];10.1038/ncb1783 [doi]
- 689 Protter, D. S., & Parker, R. (2016). Principles and Properties of Stress Granules. *Trends Cell Biol*, *26*(9), 668-  
690 679. doi:S0962-8924(16)30047-2 [pii];10.1016/j.tcb.2016.05.004 [doi]
- 691 Renton, A. E., Majounie, E., Waite, A., Simon-Sanchez, J., Rollinson, S., Gibbs, J. R., . . . Traynor, B. J. (2011).  
692 A hexanucleotide repeat expansion in C9ORF72 is the cause of chromosome 9p21-linked ALS-FTD.  
693 *Neuron*, *72*(2), 257-268. doi:S0896-6273(11)00797-5 [pii];10.1016/j.neuron.2011.09.010 [doi]
- 694 Ring, J. M., & Arias, A. M. (1993). Puckered, a Gene Involved in Position-Specific Cell-Differentiation in the  
695 Dorsal Epidermis of the Drosophila Larva. *Development*, 251-259. Retrieved from <Go to  
696 ISI>://WOS:A1993NP85500027
- 697 Ritson, G. P., Custer, S. K., Freibaum, B. D., Guinto, J. B., Geffel, D., Moore, J., . . . Taylor, J. P. (2010). TDP-  
698 43 mediates degeneration in a novel Drosophila model of disease caused by mutations in  
699 VCP/p97. *J. Neurosci*, *30*(22), 7729-7739. doi:30/22/7729 [pii];10.1523/JNEUROSCI.5894-09.2010  
700 [doi]
- 701 Ritson, G. P., Custer, S. K., Freibaum, B. D., Guinto, J. B., Geffel, D., Moore, J., . . . Taylor, J. P. (2010). TDP-  
702 43 mediates degeneration in a novel Drosophila model of disease caused by mutations in  
703 VCP/p97. *J Neurosci*, *30*(22), 7729-7739. doi:10.1523/JNEUROSCI.5894-09.2010
- 704 Rossetto, D., Avvakumov, N., & Cote, J. (2012). Histone phosphorylation: a chromatin modification  
705 involved in diverse nuclear events. *Epigenetics*, *7*(10), 1098-1108. doi:10.4161/epi.21975
- 706 Sahana, T. G., & Zhang, K. (2021). Mitogen-Activated Protein Kinase Pathway in Amyotrophic Lateral  
707 Sclerosis. *Biomedicines*, *9*(8). doi:10.3390/biomedicines9080969
- 708 Sakae, N., Bieniek, K. F., Zhang, Y. J., Ross, K., Gendron, T. F., Murray, M. E., . . . Dickson, D. W. (2018). Poly-  
709 GR dipeptide repeat polymers correlate with neurodegeneration and Clinicopathological subtypes  
710 in C9ORF72-related brain disease. *Acta Neuropathol Commun*, *6*(1), 63. doi:10.1186/s40478-018-  
711 0564-7
- 712 Sanders, D. W., Kedersha, N., Lee, D. S. W., Strom, A. R., Drake, V., Riback, J. A., . . . Brangwynne, C. P.  
713 (2020). Competing Protein-RNA Interaction Networks Control Multiphase Intracellular  
714 Organization. *Cell*, *181*(2), 306-324 e328. doi:10.1016/j.cell.2020.03.050
- 715 Shi, Y., Lin, S., Staats, K. A., Li, Y., Chang, W. H., Hung, S. T., . . . Ichida, J. K. (2018). Haploinsufficiency leads  
716 to neurodegeneration in C9ORF72 ALS/FTD human induced motor neurons. *Nat Med*, *24*(3), 313-  
717 325. doi:10.1038/nm.4490
- 718 Sone, M., Zeng, X., Larese, J., & Ryoo, H. D. (2013). A modified UPR stress sensing system reveals a novel  
719 tissue distribution of IRE1/XBP1 activity during normal Drosophila development. *Cell Stress*  
720 *Chaperones*, *18*(3), 307-319. doi:10.1007/s12192-012-0383-x
- 721 Stricker, S. H., Koferle, A., & Beck, S. (2017). From profiles to function in epigenomics. *Nat Rev Genet*,  
722 *18*(1), 51-66. doi:10.1038/nrg.2016.138
- 723 Tiwari, V. K., Stadler, M. B., Wirbelauer, C., Paro, R., Schubeler, D., & Beisel, C. (2011). A chromatin-  
724 modifying function of JNK during stem cell differentiation. *Nat Genet*, *44*(1), 94-100.  
725 doi:10.1038/ng.1036
- 726 Urano, F., Wang, X., Bertolotti, A., Zhang, Y., Chung, P., Harding, H. P., & Ron, D. (2000). Coupling of stress  
727 in the ER to activation of JNK protein kinases by transmembrane protein kinase IRE1. *Science*,  
728 *287*(5453), 664-666. doi:10.1126/science.287.5453.664
- 729 Wheeler, J. R., Matheny, T., Jain, S., Abrisch, R., & Parker, R. (2016). Distinct stages in stress granule  
730 assembly and disassembly. *Elife*, *5*. doi:10.7554/eLife.18413
- 731 Xu, Z., Poidevin, M., Li, X., Li, Y., Shu, L., Nelson, D. L., . . . Jin, P. (2013). Expanded GGGCC repeat RNA  
732 associated with amyotrophic lateral sclerosis and frontotemporal dementia causes

- 733 neurodegeneration. *Proc. Natl. Acad. Sci. U. S. A*, *110*(19), 7778-7783. doi:1219643110  
734 [pii];10.1073/pnas.1219643110 [doi]
- 735 Yang, J., Wu, Z., Renier, N., Simon, D. J., Uryu, K., Park, D. S., . . . Tessier-Lavigne, M. (2015). Pathological  
736 axonal death through a MAPK cascade that triggers a local energy deficit. *Cell*, *160*(1-2), 161-176.  
737 doi:10.1016/j.cell.2014.11.053
- 738 Yang, P., Mathieu, C., Kolaitis, R. M., Zhang, P., Messing, J., Yurtsever, U., . . . Taylor, J. P. (2020). G3BP1 Is  
739 a Tunable Switch that Triggers Phase Separation to Assemble Stress Granules. *Cell*, *181*(2), 325-  
740 345 e328. doi:10.1016/j.cell.2020.03.046
- 741 Zhang, K., Daigle, J. G., Cunningham, K. M., Coyne, A. N., Ruan, K., Grima, J. C., . . . Lloyd, T. E. (2018). Stress  
742 Granule Assembly Disrupts Nucleocytoplasmic Transport. *Cell*, *173*(4), 958-971 e917.  
743 doi:10.1016/j.cell.2018.03.025
- 744 Zhang, K., Donnelly, C. J., Haeusler, A. R., Grima, J. C., Machamer, J. B., Steinwald, P., . . . Rothstein, J. D.  
745 (2015). The C9orf72 repeat expansion disrupts nucleocytoplasmic transport. *Nature*, *525*(7567),  
746 56-61. doi:nature14973 [pii];10.1038/nature14973 [doi]
- 747 Zhang, Q., Bhattacharya, S., Pi, J., Clewell, R. A., Carmichael, P. L., & Andersen, M. E. (2015). Adaptive  
748 Posttranslational Control in Cellular Stress Response Pathways and Its Relationship to Toxicity  
749 Testing and Safety Assessment. *Toxicol Sci*, *147*(2), 302-316. doi:10.1093/toxsci/kfv130
- 750 Zhang, Y. J., Gendron, T. F., Ebbert, M. T. W., O'Raw, A. D., Yue, M., Jansen-West, K., . . . Petrucelli, L.  
751 (2018). Poly(GR) impairs protein translation and stress granule dynamics in C9orf72-associated  
752 frontotemporal dementia and amyotrophic lateral sclerosis. *Nat Med*, *24*(8), 1136-1142.  
753 doi:10.1038/s41591-018-0071-1
- 754 Zhang, Y. J., Guo, L., Gonzales, P. K., Gendron, T. F., Wu, Y., Jansen-West, K., . . . Petrucelli, L. (2019).  
755 Heterochromatin anomalies and double-stranded RNA accumulation underlie C9orf72 poly(PR)  
756 toxicity. *Science*, *363*(6428). doi:10.1126/science.aav2606
- 757 Zu, T., Liu, Y., Banez-Coronel, M., Reid, T., Pletnikova, O., Lewis, J., . . . Ranum, L. P. (2013). RAN proteins  
758 and RNA foci from antisense transcripts in C9ORF72 ALS and frontotemporal dementia. *Proc. Natl.*  
759 *Acad. Sci. U. S. A*, *110*(51), E4968-E4977. doi:1315438110 [pii];10.1073/pnas.1315438110 [doi]

760

761

762
